1 **SARS-CoV-2 induces inflammasome-dependent pyroptosis and**  
2 **downmodulation of HLA-DR in human monocytes**

3  
4 André C. Ferreira<sup>1,2,10#\*</sup>, Vinicius Cardoso Soares<sup>1,9#</sup>, Isaclaudia G. de Azevedo-  
5 Quintanilha<sup>1</sup>, Suelen da Silva Gomes Dias<sup>1</sup>, Natalia Fintelman-Rodrigues<sup>1,10</sup>, Carolina Q.  
6 Sacramento<sup>1,10</sup>, Mayara Mattos<sup>1,10</sup>, Caroline S. de Freitas<sup>1,10</sup>, Jairo R. Temerozo<sup>3,4</sup>, Lívia  
7 Teixeira<sup>1</sup>, Eugenio Damaceno Hottz<sup>1,5</sup>, Ester A Barreto<sup>1</sup>, Camila R. R. Pão<sup>1</sup>, Lohanna  
8 Palhinha<sup>1</sup>, Milene Miranda<sup>6</sup>, Dumith Chequer Bou-Habib<sup>3,4</sup>, Fernando A. Bozza<sup>7,8</sup>,  
9 Patrícia T. Bozza<sup>1</sup>, Thiago Moreno L. Souza<sup>1,10\*</sup>

10

11 1 – Laboratório de Imunofarmacologia, Instituto Oswaldo Cruz (IOC), Fundação  
12 Oswaldo Cruz (Fiocruz), Rio de Janeiro, RJ, Brazil.

13 2 – Laboratório de Pesquisa Pré-clínica - Universidade Iguaçu, Nova Iguaçu, RJ, Brazil.

14 3 – Laboratório de Pesquisas sobre o Timo, IOC, Fiocruz, Rio de Janeiro, RJ, Brazil.

15 4 – National Institute for Science and Technology on Neuroimmunomodulation, Oswaldo  
16 Cruz Institute, Fiocruz, Rio de Janeiro, RJ, Brazil.

17 5 – Laboratório de Imunotrombose, Departamento de Bioquímica, Universidade Federal  
18 de Juiz de Fora, Juiz de Fora, MG, Brazil.

19 6 – Laboratório de Vírus Respiratório e do Sarampo, IOC, Fiocruz, Rio de Janeiro, RJ,  
20 Brazil.

21 7 – Instituto Nacional de Infectologia Evandro Chagas, Fiocruz, Rio de Janeiro, RJ,  
22 Brazil.

23 8 – Instituto D’or de Pesquisa e Ensino, Rio de Janeiro, RJ, Brazil.

24 9 - Program of Immunology and Inflammation, Federal University of Rio de Janeiro,  
25 UFRJ, Rio de Janeiro, RJ, Brazil.

26 10 - Centro De Desenvolvimento Tecnológico Em Saúde (CDTS), Fiocruz, Rio de  
27 Janeiro, Brasil.

28

29 # These authors contributed equally to this work

30 \* corresponding author

31

32

33 NOTE: This preprint reports new research that has not been certified by peer review and should not be used to guide clinical practice.

## 34 **Abstract**

35 Infection by the severe acute respiratory syndrome coronavirus 2 (SARS-CoV-2) has  
36 been associated with leukopenia and uncontrolled inflammatory response in critically ill  
37 patients. A better comprehension of SARS-CoV-2-induced monocyte death is essential  
38 for the identification of therapies capable to control the hyper-inflammation and reduce  
39 viral replication in patients with COVID-19. Here, we show that SARS-CoV-2 induces  
40 inflammasome activation and cell death by pyroptosis in human monocytes,  
41 experimentally infected and from patients under intensive care. Pyroptosis was dependent  
42 on caspase-1 engagement, prior to IL-1 $\beta$  production and inflammatory cell death.  
43 Monocytes exposed to SARS-CoV-2 downregulate HLA-DR, suggesting a potential  
44 limitation to orchestrate the immune response. Our results originally describe  
45 mechanisms by which monocytes, a central cellular component recruited from peripheral  
46 blood to respiratory tract, succumb to control severe 2019 coronavirus disease (COVID-  
47 19).

## 48 **Author summary**

49 Since its emergence in China in late 2019, severe acute respiratory syndrome  
50 coronavirus 2 (SARS-CoV-2) has caused thousands of deaths worldwide. Currently, the  
51 number of individuals infected with SARS-CoV-2 and in need of antiviral, anti-  
52 inflammatory, anticoagulant and more invasive treatments has overwhelmed the health  
53 systems worldwide. In our study, we found that SARS-CoV-2 is capable of inducing  
54 inflammatory cell death in human monocytes, one of the main cell types responsible for  
55 anti-SARS-CoV-2 immune response. As a consequence of this intracellular inflammatory  
56 mechanism (inflammasome engagement), an exacerbated production of inflammatory  
57 mediators occurs. The infection also decreases the expression of HLA-DR in monocytes,  
58 a molecule related to the orchestration of the immune response in case of viral infections.  
59 We also demonstrated that the HIV-1 protease inhibitor, atazanavir (ATV), prevented the  
60 uncontrolled inflammatory response, cell death and reduction in HLA-DR expression in  
61 SARS-CoV-2-infected monocytes. Our study provides relevant information on the effects  
62 of SARS-CoV-2 infection on human monocytes, as well as on the effect of ATV in  
63 preventing these pathological effects on the host.

65

## 66 **Introduction**

67           Severe acute respiratory coronavirus 2 (SARS-CoV-2), the etiological agent of  
68 the 2019 coronavirus disease (COVID-19), emerged in China, causing a major public  
69 health burden in decades. Patients with COVID-19 may develop an asymptomatic or mild  
70 disease or be affected by the life threatening acute respiratory distress syndrome (ARDS),  
71 which is characterized by elevated serum levels of proinflammatory mediators, the  
72 cytokine storm (1–3). In the respiratory tract of patients with severe COVID-19,  
73 monocytes/macrophages may be the main source of uncontrolled levels of the pro-  
74 inflammatory mediators TNF- $\alpha$  and IL-6 (4). Plasmatic levels of IL-6 have been  
75 associated with mortality, intensive care admission and hospitalization, representing a  
76 poor prognostic factor for COVID-19 (5). The uncontrolled inflammation promoted by  
77 SARS-CoV-2 in severe COVID-19 is not acute, it negatively associates with viral loads  
78 in nasopharyngeal swabs and represents an important event from 7 to 10 days after onset  
79 of illness (6,7). The SARS-CoV-2-induced cytokine storm associates with intense cell  
80 death (8,9).

81           There are various mechanisms involved in cell death, which are differently  
82 engaged from development to responses to infection (10). For certain diseases, such as  
83 COVID-19, in which the immunopathogenesis mechanisms associate with poor clinical  
84 outcomes, controlling the way cells collapse to infection is vital for the host (10). For  
85 example, cell death from necrosis, which can occur from necroptosis to pyroptosis, tends  
86 to exacerbate inflammation due to the rupture of the cellular plasma membrane.  
87 Pyroptosis, in particular, begins with the activation of the inflammasome, an intracellular  
88 structure that involves several intracellular molecules such as caspase-1(10,11), leads to  
89 leakage of the cytoplasmic content, favors inflammatory infiltrate (11) and amplifies of  
90 the inflammatory response (12). These mechanisms of cell death contrasts with apoptosis,  
91 a more controlled process that maintain the host's homeostasis.

92           In severe COVID-19, the cytokine storm associates with high levels of tissue  
93 insult, judged by increased levels lactate dehydrogenase (LDH) and D-dimer in the  
94 plasma (6–8). Moreover, high LDH levels and leukopenia in severe COVID-19 points  
95 out that white cells loses the integrity of plasma membrane (6–8). Among these cells,

96 monocytes should orchestrate the equilibrium between innate and adaptative immune  
97 responses, which may be presumably affected during cytokine storm. Indeed, severe  
98 immune dysregulation with low antigen presenting capacity is evidenced by reduced  
99 expression of HLA-DR in monocytes during COVID-19, which is strongly associated  
100 with severe respiratory failure (4).

101 The leukopenia of patients with severe COVID-19 seem to precede the cytokine  
102 storm (13–18). Moreover, in other virus-induced cytokine storm episodes in the  
103 respiratory tract, such as induced by influenza A virus, monocytes and macrophages are  
104 severely affected (13). Thus, we hypothesized that the monocyte cell death induced by  
105 SARS-COV-2 exacerbates the production of inflammatory cytokines, as well as impairs  
106 the immune balance in the hosts. In fact, we found that SARS-CoV-2 triggers the  
107 activation of the inflammasome, leading to pyroptosis in human monocytes, by  
108 experimental or natural infection. Pyroptosis was dependent on caspase-1 engagement,  
109 prior to IL-1 $\beta$  production and dysregulation of cytokine release. Monocytes that survive  
110 after SARS-CoV-2 challenge downregulate HLA-DR, being less likely to properly  
111 orchestrate the immune response. Finally, we show that the repropesed antiviral drug  
112 atazanavir (ATV) could block this deleterious loop in favor of the host.

## 113 **Material and Methods**

### 114 **Reagents**

115 Atazanavir (ATV) and Ribavirin were received as donations from Instituto de  
116 Tecnologia de Fármacos (Farmanguinhos, Fiocruz). The antiviral Lopinavir/ritonavir  
117 (4:1 proportion) was purchased from AbbVie (Ludwingshafen, Germany). ELISA assays  
118 were purchased from R&D Bioscience. Lipopolysacchadides - LPS, adenosine  
119 triphosphate (ATP), the specific inhibitor of caspase-1 (AC-YVAD-CMK), pan-caspase  
120 inhibitor (ZVAD-FMK), RIPK1 (Necrostatin-1 – Nec-1) and IL-1 receptor (IL-1RA)  
121 were all purchased from Sigma-Aldrich (St. Louis, MO, USA). All small molecule  
122 inhibitors were dissolved in 100 % dimethylsulfoxide (DMSO) and subsequently diluted  
123 at least 10<sup>4</sup>-fold in culture or reaction medium before each assay. The final DMSO  
124 concentrations showed no cytotoxicity. The materials for cell culture were purchased  
125 from Thermo Scientific Life Sciences (Grand Island, NY), unless otherwise mentioned.

126

## 127 **Cells and Virus**

128 African green monkey kidney (Vero, subtype E6) cells were cultured in DMEM  
129 high glucose supplemented with 10 % fetal bovine serum (FBS; HyClone, Logan, Utah)  
130 and 100 U/mL penicillin, and 100 µg/mL streptomycin (P/S). Vero cells were incubated  
131 at 37°C in 5 % CO<sub>2</sub> atmosphere.

132 Human primary monocytes were obtained through plastic adherence of peripheral  
133 blood mononuclear cells (PBMCs), which were obtained from buffy coat preparations of  
134 healthy donors by density gradient centrifugation (Ficoll-Paque, GE Healthcare). In brief,  
135 PBMCs ( $2.0 \times 10^6$  cells) were plated onto 48-well plates (NalgeNunc) in RPMI-1640  
136 without serum for 2 to 4 h; then, non-adherent cells were removed by washing and the  
137 remaining monocytes were maintained in DMEM with 5% human serum (HS; Millipore)  
138 and penicillin/streptomycin.

139 SARS-CoV-2 was isolated and expanded on Vero E6 cells from a nasopharyngeal  
140 swab of a confirmed case from Rio de Janeiro, Brazil. Experiments were performed after  
141 one passage in cell culture, when Vero E6 cells with DMEM plus 2% FBS in 150 cm<sup>2</sup>  
142 flasks were incubated at 37 °C in 5 % CO<sub>2</sub> atmosphere. Cytopathic effect was observed  
143 daily and peaked 4 to 5 days after infection. All procedures related to virus culture were  
144 handled at biosafety level 3 (BSL3) multiuser facility, according to WHO guidelines.  
145 Virus titers were determined as the tissue culture infectious dose at 50% (TCID<sub>50</sub>/mL).  
146 Virus stocks were kept in -80 °C ultralow freezers. The virus strain was sequenced to  
147 confirm the virus identity and its complete genome is publicly deposited (GenBank  
148 accession no. MT710714).

## 149 **Yield-reduction assay**

150 Human primary monocytes were infected with multiplicity of infection (MOI) of  
151 0.01 at density of  $2-8 \times 10^5$  cells/well in 48-well culture plates, depending on the total cell  
152 number from each donor. After 1 h at 37 °C, cells were washed, and various  
153 concentrations of compounds were added in DMEM with 2% FBS. After 48 h, the

154 supernatants were harvested and virus replication was quantified by real time RT- PCR  
155 and infectious titers by TCID<sub>50</sub>/mL.

### 156 **Virus titration**

157 Monolayers of Vero cells ( $2 \times 10^4$  cell/well) in 96-well culture plates were infected  
158 with log- based dilutions of the supernatants containing SARS-CoV-2 for 1 h at 37°C.  
159 The cells were washed and fresh medium with 2% FBS was added. After 3 to 5 days, the  
160 cytopathic effects were scored in at least 10 replicates per dilution by independent readers,  
161 who were blind with respect to source of the supernatant. Reed and Muench scoring  
162 method was employed to determine TCID<sub>50</sub>/mL.

### 163 **Flow cytometer analysis**

164 For flow cytometry analysis, monocytes were diluted in labelling buffer ( $10^6$   
165 cells/mL). Then, 100  $\mu$ L of cell samples were marked with 5  $\mu$ L of AnnexinV and PI for  
166 15 minutes for cell death evaluation. Around 10,000 gated events were acquired using  
167 FACSCalibur and the analysis was performed using the CellQuest software. Monocytes  
168 were gated through cell size (forward light scatter, FSC) and granularity (side light scatter,  
169 SSC) analysis.

170 Human monocytes were stained for caspase-1 activity with FAM-YVAD-FMK  
171 (fluorescent-labeled inhibitor of caspase-1 [FLICA] and FAM-FLICA Caspase-3/7  
172 activity or HLA-DR APC.H7 or IgG APC.H7. Caspase-1 and caspase-3/7 activity was  
173 determined via flow cytometry (FACSCalibur) by detecting FLICA fluorescence and  
174 expression of HLA-DR as mean fluorescence intensity (MFI) value for each sample.  
175 Acquisition of data was set to count a total of 10,000 events, and the FLOWJO software  
176 package was used to analyze the data.

### 177 **Microscopic analysis**

178 Human primary monocytes were plated on glass coverslips at density of  $2-8 \times 10^5$   
179 cells/well in 48-well plates. Infection was performed for 2 h at 37 °C and then fresh  
180 medium with 2% FBS was added. After 24 h, the cells were washed with Binding buffer  
181 and stained with PI (0.5  $\mu$ g/mL) for 5 minutes. Next, the cells were fixed with 3.7%  
182 formaldehyde for 30 minutes at room temperature. The nuclei were stained with DAPI

183 (1µg/mL) for 5 min and the coverslips were mounted using an antifade mounting medium  
184 (VECTASHIELD). Fluorescence was analyzed by fluorescence microscopy with an x100  
185 objective lens (Olympus, Tokyo, Japan).

## 186 **Measurements Inflammatory Mediators and cell death marker**

187 The levels of IL-1β, TNF-α, IL-6, IL-8 and LDH were quantified in the culture  
188 supernatants from infected and uninfected monocytes using ELISA kits, according to the  
189 manufacturer's instructions (R&D System).

190 Extracellular lactate dehydrogenase (LDH) was quantified using Doles® kit  
191 according to manufacturer's instructions. In brief, cell culture supernatants were  
192 centrifuged at 5,000 rpm for 1 minute, to remove cellular debris, and then 25 µL were  
193 placed into 96-well plates and incubated with 5 µL of ferric alum and 100 µL of LDH  
194 substrate for 3 minutes at 37 °C. Nicotinamide adenine dinucleotide (NAD, oxidized  
195 form) was added followed by the addition of a stabilizing solution. After 10 minutes, the  
196 reaction was read in a spectrophotometer at 492 nm.

## 197 **Western blot assay**

198 Cellular extracts of 1x10<sup>6</sup> cells were homogenized in the RIPA lysis buffer in the  
199 presence of proteinase inhibitor cocktail (Roche), and the protein levels were measured  
200 by BCA protein assay kit. A total of 20 µg of protein was loaded onto a 10% sodium  
201 dodecyl sulfate polyacrylamide gel (SDS-PAGE) for separation by electrophoresis and  
202 the protein bands were then transferred to a polyvinylidene difluoride membranes  
203 (ImmobilonP-SQ, Millipore). The membranes were blocked with 5 % albumin diluted in  
204 Tris-buffered saline containing 0.05 % of Tween 20 for 2 hours at room temperature and  
205 incubated with the specific primary antibodies (Cell Signaling Technology), to detect pro-  
206 caspase-1 and cleaved-caspase-1, after overnight incubation at 4 °C. After washing,  
207 membranes were incubated with secondary antibodies (IRDye® 800CW Goat-anti-  
208 Mouse and IRDye® 680LT Goat anti-Rabbit IgG Antibody, LI-COR, Lincoln) for 30  
209 minutes at RT. The protein bands were visualized by digital fluorescence  
210 (Odyssey® CLx Imaging System), and protein density was analyzed by the ImageJ  
211 software. All the data were normalized by β-actin expression quantification.

212

## 213 **Human subjects.**

214 We prospectively enrolled severe COVID19 RT-PCR-confirmed cases, as well as  
215 SARS-CoV-2-negative healthy controls. Blood samples were obtained from 12 patients  
216 with severe COVID-19 within 72 hours from intensive care unit (ICU) admission in two  
217 reference centers (Instituto Estadual do Cérebro Paulo Niemeyer and Hospital Copa Star,  
218 Rio de Janeiro, Brazil). Severe COVID-19 was defined as critically ill patients presenting  
219 viral pneumonia on computed tomography scan and in mechanical ventilation. All  
220 patients had SARSCoV-2 confirmed diagnostic through RT-PCR of nasal swab or  
221 tracheal aspirates. Peripheral vein blood was also collected from 8 SARS-CoV-2-negative  
222 healthy control participants as tested by RT-PCR on the day of blood sampling. The  
223 characteristics of severe (n = 12), and control (n = 8) participants are presented in Table  
224 1. Severe COVID-19 patients usually present older age and higher prevalence of  
225 comorbidities as obesity, cardiovascular diseases and diabetes as in previously reported  
226 patient cohorts. In the present study, the SARS-CoV-2-negative control group was  
227 designed to include subjects of older age and chronic non-communicable diseases, so it  
228 is matched with critically ill COVID-19 patients (Table 1). Patients with acute respiratory  
229 distress syndrome (ARDS) were managed with neuromuscular blockade and a protective  
230 ventilation strategy that included low tidal volume (6 mL/kg of predicted body weight)  
231 and limited driving pressure (less than 16 cmH<sub>2</sub>O) as well as optimal PEEP calculated  
232 based on the best lung compliance and PaO<sub>2</sub>/FiO<sub>2</sub> ratio. In those with severe ARDS and  
233 PaO<sub>2</sub>/FiO<sub>2</sub> ratio below 150 despite optimal ventilatory settings, prone position was  
234 initiated. Our management protocol included antithrombotic prophylaxis with enoxaparin  
235 40 to 60 mg per day. Patients did not receive routine steroids, antivirals or other anti-  
236 inflammatory or anti-platelet drugs. The SARS-CoV-2- negative control participants  
237 were not under anti-inflammatory or anti-platelet drugs for at least two weeks. All clinical  
238 information were prospectively collected using a standardized form - ISARIC/WHO  
239 Clinical Characterization Protocol for Severe Emerging Infections (CCPBR).

## 240 **Ethics statement.**

241 Experimental procedures involving human cells from healthy donors were  
242 performed with samples obtained after written informed consent and were approved by  
243 the Institutional Review Board (IRB) of the Oswaldo Cruz Foundation/Fiocruz (Rio de  
244 Janeiro, RJ, Brazil) under the number 397-07. The National Review Board approved the



245 study protocol (CONEP 30650420.4.1001.0008), and informed consent was obtained  
246 from all participants or patients' representatives.

## 247 **Statistical analysis**

248 The assays were performed in blinded way. They were performed by one  
249 professional, codified and read by another fellow. All experiments were carried out at  
250 least three independent times, including a minimum of two technical replicates in each  
251 assay. The equations to fit the best curve were generated based on  $R^2$  values  $\geq 0.9$ .  
252 Student's T-test was used to access statistically significant P values  $<0.05$ .

## 253 **Results**

### 254 **SARS-CoV-2 promotes pyroptosis in human monocytes**

255 To characterize the mechanism by which SARS-CoV-2 triggers monocyte death,  
256 human primary monocytes were infected with SARS-CoV-2 or treated with LPS+ATP.  
257 Next, cell death was analyzed by quantifying the LDH activity in the culture supernatant,  
258 and by AnnexinV/propidium iodide (PI) cell labeling through for flow cytometry and  
259 fluorescence microscopy. As shown in Figure 1A, SARS-CoV-2 increased LDH levels  
260 similarly to the positive control, LPS+ATP (Figure 1A). Flow cytometry and fluorescence  
261 microscopy images demonstrated higher percentages of PI<sup>+</sup> cells in the infected cultures,  
262 as well as a significant increase in mean fluorescence intensity (MFI). Both, LDH leak  
263 and PI labeling characterize cell membrane disruption in human monocytes after SARS-  
264 CoV-2 infection (Figure 1B-E). These data suggest that SARS-CoV-2 infection can  
265 induce cell death characterized by loss of plasma membrane integrity suggestive of  
266 pyroptosis cell death.

### 267 **SARS-CoV-2 induces pyroptosis in monocytes through inflammasome activation**

268 To gain insights on the mechanisms of monocyte cell death in SARS-CoV-2  
269 infection, we accessed caspase-1 activation - a key events that require inflammasome's  
270 proteolytic activity. Cells stimulated with LPS+ATP were used as a positive control of  
271 inflammasome activation. We observed that SARS-CoV-2 induced pro-caspase-1  
272 cleavage, similarly to positive control (Figure 2A and 2B). To confirm these results, cells  
273 were labeled with FAM-YVAD-FLICA (as an indicative of caspase-1 activation) and

274 analyzed by flow cytometry. We found that SARS-CoV-2 infection induced the  
275 activation of caspase-1 in monocytes in the same magnitude to the positive control group  
276 (Figure 2C and 2D). Moreover, SARS-CoV-2-induced caspase-1 activation was a  
277 specific event, since we did not observe activation of the apoptotic caspases-3 and -7 in  
278 infected monocytes (Figure 2E and 2F). As caspase-1 activity is critical for the production  
279 of IL-1 $\beta$  (19,20), we measured the levels of this cytokine in our experiments. Our data  
280 show that SARS-CoV-2 infection was able to increase IL-1 $\beta$  production, this  
281 phenomenon being prevented with pretreatment with AC-YVAD-CMK, and not altered  
282 with a necroptosis inhibitor. (Figure 2G). Importantly, inhibition of IL-1R engagement  
283 reduced SARS-CoV-2-mediated caspase-1 activation and LDH release (Figure S1),  
284 suggesting that inflammasome-dependent IL-1 $\beta$  secretion amplify caspase-1 activation  
285 and pyroptosis in SARS-CoV-2 infection.

### 286 **Inflammasome activation amplify pro-inflammatory cytokines secretion in infected** 287 **monocytes**

288 To evaluate the effect of the activation of inflammasome and pyroptosis on the  
289 immune response, we quantified the production of key cytokines in the amplification of  
290 the inflammatory process observed clinically in a patient during the course of the  
291 infection with IL-6 and TNF- $\alpha$ . Remarkably, caspase-1 specific inhibition, but not pan-  
292 caspase or RIPK1 inhibitor, also led to lower levels of the pro-inflammatory cytokines  
293 IL-6 and TNF- $\alpha$ , highlighting the participation of the caspase-1-IL-1 $\beta$  axis in  
294 inflammatory amplification during SARS-CoV-2 infection. (Figure 3A and 3B). To  
295 confirm the effects in SARS-CoV-2 infection in the immune response, whether the  
296 observed effect is specifically related to inflammasome activation, we evaluated the  
297 production of IL-8, in which induction is independent of the inflammasomes pathway.  
298 SARS-CoV-2 infection induced a higher IL-8 production, which was not prevented by  
299 caspase-1 inhibition (Figure 3C). In addition, inhibition of IL-1R engagement reduced  
300 SARS-CoV-2-mediated was able to significantly decrease the production of IL-1  $\beta$ , IL-  
301 6, TNF- $\alpha$  and did not alter the production of IL-8 (Figure S2).

302

303

304 **Infection with SARS-CoV-2 decreases the expression of HLA class II in human**  
305 **monocytes independently of the activation of inflammasomes**

306 To investigate the impact of inflammasome activation and cell death through  
307 pyroptosis on the orchestration of anti-SARS-CoV-2 immune response, cells were then  
308 marked with HLA-DR and analyzed by flow cytometry. We found that SARS-CoV-2  
309 infection induced a decrease in HLA-DR expression in monocytes (Figure 4A and 4B).  
310 However, the inhibition of caspase-1 (Figure 4A and 4B) and IL-1R engagement (Figure  
311 S3) did not prevent the SARS-CoV-2-mediated decreasing of HLA expression. These  
312 results suggest that even in disassociation with the engagement of SARS-CoV-2-induced  
313 inflammasome activation, monocytes exposed to the new CoV will present limited ability  
314 to orchestrate the immune response.

315 **Atazanavir prevented inflammasome-dependent pyroptosis**

316 Given our findings that pyroptosis and decreased HLA-DR expression are  
317 triggered during SARS-CoV-2 replication, we tested whether atazanavir (ATV), an HIV  
318 protease inhibitor recently shown to possess antiviral activity against the new CoV in  
319 monocytes (17), could prevent these events. Flow cytometry analysis of SARS-CoV-2-  
320 infected monocytes treated with ATV demonstrated a significant reduction in caspase-1  
321 activity, observed by the decreased FAM-YVAD-FLICA labeling (Figure 5A and 5B).  
322 Other orally available repurposed anti-SARS-CoV-2 drugs, such as lopinavir (LPV) and  
323 ribavirin (RBV), did not affect SARS-CoV-2-induced pyroptosis (Figure 5C). Moreover,  
324 treatments with ATV did not alter the activity of caspase-1, -3 and -7 in monocytes  
325 exposed to LPS and ATP, used as a positive control of pyroptosis (Figure S4), indicating  
326 a specific antiviral activity of this drug. Consistently, treatment with ATV also reduced  
327 the levels of IL-1 $\beta$ , IL-6 and TNF- $\alpha$  in SARS-CoV-2-infected monocytes, when  
328 compared to the untreated cells (Figure 5D-F). ATV did not interfere with the production  
329 of IL-8, which is independent of inflammasome engagement (Figure 5G).

330 We then confirmed whether ATV can prevent SARS-CoV-2-induced pyroptosis.  
331 Lower levels of LDH were detected in the supernatants of SARS-CoV-2-infected  
332 monocytes treated with ATV, when compared to infected and untreated cells (Figure 5H).  
333 The treatment with ATV was also able to prevent the decrease of HLA-DR expression in  
334 infected monocytes (Figure 5I and J). LPV and RBV did not alter the HLA-DR expression

335 in monocytes infected with SARS-Cov-2 (Figure S5). Since ATV inhibits the early  
336 proteolytic processing of viral antigens, an early event during SARS-CoV-2 replication,  
337 this drug represented the most upstream process pharmacologically inhibited in this  
338 investigation to prevent pyroptosis and HLA-DR knockdown.

### 339 **Inflammasome activation and pyroptosis are risk factors in critically ill COVID-19** 340 **patients**

341 To clinically validate our findings, we evaluated if monocytes obtained from  
342 critically ill patients with COVID-19 would also display signals of inflammasome  
343 engagement and pyroptosis. We observed that monocytes from COVID-19 patients had  
344 increased caspase-1 activation (Figure 6A and 6B) and significantly higher PI+ staining,  
345 when compared to monocytes from healthy donors (HD) (Figure 6C and 6D).  
346 Corroborating with our *in vitro* data, we also detected higher levels of IL-1 $\beta$  in the plasma  
347 of critically ill patients (Figure 6E). Therefore, the *in vitro* results from the previous  
348 sections stand on the shoulders of the clinical relevance of monocytes in patients with  
349 severe COVID-19.

### 350 **SARS-CoV-2 infection induces inflammasome-dependent pyroptosis and** 351 **downmodulation of HLA-DR monocytes, which can be prevented by atazanavir**

352 A representative scheme to summarize the effect of SARS-CoV-2 infection upon  
353 in the increase of TNF- $\alpha$  and IL-6 levels, as part of an immunodysregulation promoted  
354 by pyroptosis. SARS-CoV-2-induced pyroptosis engages inflammasomes, to activate  
355 caspase-1 and IL-1 $\beta$ . Release of IL-1 $\beta$  amplify the activation of inflammasomes during  
356 the SARS-CoV-2 infection. In parallel, SARS-CoV-2 also induces the HLA-DR  
357 downregulation. ATV prevented SARS-CoV-2-induced deleterious effects on monocyte  
358 biology.

## 359 **Discussion**

360 COVID-19 has caused in less than 8 months over 800,000 deaths worldwide (21)  
361 and represent the major public health crisis of the beginning of 21<sup>st</sup> century, leading to an  
362 unpredictable impact in global economics (22,23). SARS-CoV-2 infection triggers an  
363 uncontrolled inflammatory response and marked leukopenia with consequent  
364 lung/respiratory dysfunction, which are the characteristics of the most severe

365 manifestations of the COVID-19 (24,25). Similarly, to other respiratory viruses (26-29),  
366 SARS-CoV-2 induces a cytokine storm, characterized by an uncontrolled inflammatory  
367 response mediated by monocytes/macrophages, when they should orchestrate the  
368 antiviral immune response (30). In this work, we demonstrate that SARS-CoV-2 infection  
369 triggers inflammasome activation, increases IL-1 $\beta$  secretion by monocytes, resulting in  
370 pyroptotic cell death, which could be a key event for SARS-CoV-2 pathogenesis in  
371 critically ill patients (31). This deleterious immune dysregulation loop triggered by  
372 SARS-CoV-2 may be impaired by ATV.

373 Our results demonstrate that SARS-CoV-2 leads to an intense cell death in human  
374 monocytes, observed by the increase in LDH release in infected cultures, as well as by  
375 the higher number of PI<sup>+</sup> cells when compared to uninfected controls. Even though the  
376 pretreatment of infected monocytes with the pan-caspase inhibitor ZVAD-FMK  
377 prevented IL-1 $\beta$  secretion, it was not able to prevent the release of LDH. Indeed, others  
378 have demonstrated that the treatment with ZVAD-FMK induces necroptosis in diverse  
379 cell types (32-34). Notably, as pyroptosis is an inflammatory and programmed cell death  
380 mediated by inflammasome and inflammatory caspase-1 activation (10,11), we  
381 investigated the engagement and activation of these structures in human monocytes  
382 infected with SARS-CoV-2. Activation of caspase-1 and increased production of IL-1 $\beta$   
383 were observed in infected monocytes. This is correlated to the activation of  
384 inflammasomes, because the pretreatment of infected monocytes with YVAD prevented  
385 caspase-1 activation. These *in vitro* results are in accordance with the literature and with  
386 our finding described here that indicate the formation of inflammasomes in patients with  
387 severe COVID-19 (35). We also showed that the release of IL-1 $\beta$  could be promoted by  
388 the activation of inflammasomes during the SARS-CoV-2 infection, because blockage of  
389 IL-1 $\beta$  receptors reduced caspase-1 activation and cell death. These results corroborate  
390 with studies showing that the increase in IL-1 $\beta$  production is associated with severe  
391 COVID-19 (36-38). Under our experimental conditions, the increase in IL-1 $\beta$  precedes  
392 the unbalanced IL-6 release. These information should not be neglected when considering  
393 biopharmaceuticals to tackle cytokine storm in severe COVID-19.

394 Monocytes that survived from SARS-CoV-2 infection displayed decreased HLA-  
395 DR expression, which has also been described in monocytes isolated from COVID-19  
396 patients (39,40). Our results suggest that this modulation of HLA expression is not

397 directly associated with the activation of inflammasomes, and may be involved by other  
398 inflammatory pathways, since we and others have observed increased levels of IL-6 by  
399 myeloid cells impairing HLA-DR membrane expression (41).

400 To establish the clinical relevance of SARS-CoV-2-induced pyroptosis in  
401 monocytes (41,41), we analyzed peripheral monocytes isolated from patients with severe  
402 COVID-19. We found that the cells from the patients displayed higher caspase-1  
403 activation, when compared with monocytes isolated from HD. Recent clinical data reveal  
404 high levels of LDH and consistent leukopenia in critically ill COVID-19 patients  
405 (6,7,35,42-44). Our data also demonstrate intense monocyte death in COVID-19 patients,  
406 as detected through flow cytometry analyzes. Altogether, these data suggest that the  
407 severity of COVID-19 may be associated with inflammasome activation in monocytes  
408 that results in large amounts of IL-1 $\beta$  and generates an excessive inflammatory response,  
409 further characterized by high levels of IL-6 and TNF- $\alpha$ . Consistently, treatment with IL-  
410 1RA has been associated with clinical and inflammatory improvements in critically ill  
411 COVID-19 patients (45). These results are in line with clinical case reports that  
412 demonstrate that monocytes/macrophages are key cells in the deleterious pro-  
413 inflammatory events that characterize the most serious cases of COVID-19 (46-49).

414 To the best of our knowledge, effective therapies for COVID-19 should ideally  
415 combine antiviral/anti-inflammatory drugs to reduce viral load and to mitigate the  
416 cytokine storm. In the present study, we showed that ATV, an antiretroviral approved in  
417 2003 for HIV-1 treatment and previously described by us as having anti-SARS-CoV-2  
418 effects in different cell types (including monocytes)(50), to block new CoV-induced  
419 pyroptosis and HLA-DR knockdown in monocytes. In addition, ATV inhibited the  
420 release of LDH and the production of IL-1 $\beta$ , f IL-6 and TNF- $\alpha$  from SARS-CoV-2-  
421 infected monocytes, which are key players in the cytokine storm associated with COVID-  
422 19 (51,52).

423 In this work, we originally describe that infection with SARS-CoV-2 can induce  
424 pyroptotic cell death by inflammasome activation, which may be related to the intense  
425 leukopenia and exacerbated inflammation seen in severe cases of the COVID-19. Since  
426 there is no specific therapy for this disease, our results point out that ATV has a promising  
427 therapeutic potential against SARS-CoV-2-induced cell death.

## 428 **Acknowledgments and funding**

429 We thank the Hemotherapy Service from Hospital Clementino Fraga Filho  
430 (Federal University of Rio de Janeiro, Brazil) for providing buffy-coats. This work was  
431 supported by grants from Fundação de Amparo a Pesquisa do Estado do Rio de Janeiro  
432 (FAPERJ), Inova Fiocruz, Conselho Nacional de Desenvolvimento Científico e  
433 Tecnológico (CNPq) and Coordenação de Aperfeiçoamento de Pessoal de Nível Superior  
434 (CAPES) and Mercosur Fund for Structural Convergence (FOCEM, Mercosur, grant  
435 number 03/11) granted for Thiago Moreno L. Souza, Patrícia T. Bozza, Fernando A.  
436 Bozza and Dumith Chequer Bou-Habib. Funding was also provided by CNPq, CAPES  
437 and FAPERJ through the National Institutes of Science and Technology Program (INCT)  
438 to Carlos Morel (INCT-IDPN) and to Wilson Savino (INCT-NIM). Thanks are due to  
439 Oswaldo Cruz Foundation/Fiocruz under the auspicious of Inova program. The funding  
440 sponsors had no role in the design of the study; in the collection, analyses, or  
441 interpretation of data; in the writing of the manuscript, and in the decision to publish the  
442 results.

## 443 **References**

- 444 1. Conti P, Ronconi G, Caraffa A, Gallenga CE, Ross R, Frydas I, et al. Induction  
445 of pro-inflammatory cytokines (IL-1 and IL-6) and lung inflammation by  
446 COVID-19: anti-inflammatory strategies. *Journal of biological regulators and*  
447 *homeostatic agents*. 2020.
- 448 2. Long B, Brady WJ, Koyfman A, Gottlieb M. Cardiovascular complications in  
449 COVID-19. *American Journal of Emergency Medicine*. 2020.
- 450 3. Li J, Fan J-G. Characteristics and Mechanism of Liver Injury in 2019  
451 Coronavirus Disease. *J Clin Transl Hepatol*. 2020.
- 452 4. Giamarellos-Bourboulis EJ, Netea MG, Rovina N, Akinosoglou K,  
453 Antoniadou A, Antonakos N, et al. *Cell Host Microbe*. 2020.
- 454 5. Du RH, Liang LR, Yang CQ, Wang W, Cao TZ, Li M, et al. Predictors of  
455 mortality for patients with COVID-19 pneumonia caused by SARSCoV- 2: A  
456 prospective cohort study. *Eur Respir J*. 2020.

- 457 6. Zhou F, Yu T, Du R, Fan G, Liu Y, Liu Z, et al. Clinical course and risk factors  
458 for mortality of adult inpatients with COVID-19 in Wuhan, China: a  
459 retrospective cohort study. *Lancet*. 2020.
- 460 7. Wölfel R, Corman VM, Guggemos W, Seilmaier M, Zange S, Müller MA, et  
461 al. Virological assessment of hospitalized patients with COVID-2019. *Nature*.  
462 2020.
- 463 8. Wang J, Jiang M, Chen X, Montaner LJ. Cytokine storm and leukocyte  
464 changes in mild versus severe SARS-CoV-2 infection: Review of 3939  
465 COVID-19 patients in China and emerging pathogenesis and therapy  
466 concepts. *Journal of Leukocyte Biology*. 2020.
- 467 9. Chen Z, John Wherry E. T cell responses in patients with COVID-19. *Nature*  
468 *Reviews Immunology*. 2020.
- 469 10. Danthi P. Viruses and the Diversity of Cell Death. *Annual Review of*  
470 *Virology*. 2016.
- 471 11. Jorgensen I, Miao EA. Pyroptotic cell death defends against intracellular  
472 pathogens. *Immunological Reviews*. 2015.
- 473 12. Man SM, Karki R, Kanneganti TD. Molecular mechanisms and functions of  
474 pyroptosis, inflammatory caspases and inflammasomes in infectious diseases.  
475 *Immunological Reviews*. 2017.
- 476 13. Xu Z, Shi L, Wang Y, Zhang J, Huang L, Zhang C, et al. Pathological findings  
477 of COVID-19 associated with acute respiratory distress syndrome. *Lancet*  
478 *Respir Med*. 2020.
- 479 14. Han Y, Zhang H, Mu S, Wei W, Jin C, Xue Y, et al. Lactate dehydrogenase,  
480 a Risk Factor of Severe COVID-19 Patients. *medRxiv*. 2020.
- 481 15. Terpos E, Ntanasis-Stathopoulos I, Elalamy I, Kastritis E, Sergentanis TN,  
482 Politou M, et al. Hematological findings and complications of COVID-19.  
483 *American Journal of Hematology*. 2020.
- 484 16. Li YX, Wu W, Yang T, Zhou W, Fu YM, Feng QM, et al. [Characteristics of  
485 peripheral blood leukocyte differential counts in patients with COVID-19].  
486 *Zhonghua nei ke za zhi*. 2020.
- 487 17. Ding X, Yu Y, Lu B, Huo J, Chen M, Kang Y, et al. Dynamic profile and  
488 clinical implications of hematological parameters in hospitalized patients with  
489 coronavirus disease 2019. *Clin Chem Lab Med*. 2020.



- 490 18. Singh A, Sood N, Narang V, Goyal A. Morphology of COVID-19-affected  
491 cells in peripheral blood film. *BMJ Case Reports*. 2020.
- 492 19. Zalinger ZB, Elliott R, Weiss SR. Role of the inflammasome-related cytokines  
493 Il-1 and Il-18 during infection with murine coronavirus. *J Neurovirol*. 2017.
- 494 20. Franchi L, Eigenbrod T, Muñoz-Planillo R, Nuñez G. The inflammasome: A  
495 caspase-1-activation platform that regulates immune responses and disease  
496 pathogenesis. *Nature Immunology*. 2009.
- 497 21. OPAS. COVID-19 (doença causada pelo novo coronavírus). *Folha Inf*. 2020.
- 498 22. Dong E, Du H, Gardner L. An interactive web-based dashboard to track  
499 COVID-19 in real time. *The Lancet Infectious Diseases*. 2020.
- 500 23. Wissel BD, Van Camp PJ, Kouril M, Weis C, Glauser TA, White PS, et al. An  
501 Interactive Online Dashboard for Tracking COVID-19 in U.S. Counties,  
502 Cities, and States in Real Time. *J Am Med Inform Assoc*. 2020.
- 503 24. Lucas C, Wong P, Klein J, Castro TBR, Silva J, Sundaram M, et al.  
504 Longitudinal analyses reveal immunological misfiring in severe COVID-19.  
505 *Nature*. 2020.
- 506 25. Tay MZ, Poh CM, Rénia L, MacAry PA, Ng LFP. The trinity of COVID-19:  
507 immunity, inflammation and intervention. *Nature Reviews Immunology*.  
508 2020.
- 509 26. Teijaro JR. The role of cytokine responses during influenza virus pathogenesis  
510 and potential therapeutic options. *Curr Top Microbiol Immunol*. 2014.
- 511 27. Szretter KJ, Gangappa S, Lu X, Smith C, Shieh W-J, Zaki SR, et al. Role of  
512 Host Cytokine Responses in the Pathogenesis of Avian H5N1 Influenza  
513 Viruses in Mice. *J Virol*. 2007.
- 514 28. Peschke T, Bender A, Nain M, Gemsa D. Role of Macrophage Cytokines in  
515 Influenza A Virus Infections. *Immunobiology*. 1993.
- 516 29. Woo PCY, Tung ETK, Chan KH, Lau CCY, Lau SKP, Yuen KY. Cytokine  
517 profiles induced by the novel swine-origin influenza A/H1N1 virus:  
518 Implications for treatment strategies. *J Infect Dis*. 2010.
- 519 30. Jamilloux Y, Henry T, Belot A, Viel S, Fauter M, El Jammal T, et al. Should  
520 we stimulate or suppress immune responses in COVID-19? Cytokine and anti-  
521 cytokine interventions. *Autoimmunity Reviews*. 2020.

- 522 31. Zheng Z, Peng F, Xu B, Zhao J, Liu H, Peng J, et al. Risk factors of critical &  
523 mortal COVID-19 cases: A systematic literature review and meta-analysis.  
524 Journal of Infection. 2020.
- 525 32. Siegmund D, Kums J, Ehrenschwender M, Wajant H. Activation of TNFR2  
526 sensitizes macrophages for TNFR1-mediated necroptosis. Cell Death Dis.  
527 2016.
- 528 33. Kim SJ, Li J. Caspase blockade induces RIP3-mediated programmed necrosis  
529 in Toll-like receptor-activated microglia. Cell Death Dis. 2013.
- 530 34. Wu YT, Tan HL, Huang Q, Sun XJ, Zhu X, Shen HM. ZVAD-induced  
531 necroptosis in L929 cells depends on autocrine production of TNF $\alpha$  mediated  
532 by the PKC-MAPKs-AP-1 pathway. Cell Death Differ. 2011.
- 533 35. Rodrigues S, de Sá KS, Ishimoto AY, Becerra A, Oliveira S, Almeida L, et al.  
534 Inflammasome activation in COVID-19 patients 1 2 Tamara. medRxiv. 2020;
- 535 36. Abbasifard M, Khorramdelazad H. The bio-mission of interleukin-6 in the  
536 pathogenesis of COVID-19: A brief look at potential therapeutic tactics. Life  
537 Sciences. 2020.
- 538 37. Yao Z, Zheng Z, Wu K, Zheng J. Immune environment modulation in  
539 pneumonia patients caused by coronavirus: SARS-CoV, MERS-CoV and  
540 SARS-CoV-2. Aging (Albany NY). 2020.
- 541 38. Zhang Y, Li J, Zhan Y, Wu L, Yu X, Zhang W, et al. Analysis of serum  
542 cytokines in patients with severe acute respiratory syndrome. Infect Immun.  
543 2004.
- 544 39. Ong EZ, Chan YFZ, Leong WY, Lee NMY, Kalimuddin S, Haja Mohideen  
545 SM, et al. A Dynamic Immune Response Shapes COVID-19 Progression. Cell  
546 Host Microbe. 2020.
- 547 40. Laing AG, Lorenc A, del Molino del Barrio I, Das A, Fish M, Monin L, et al.  
548 A dynamic COVID-19 immune signature includes associations with poor  
549 prognosis. Nat Med [Internet]. 2020; Available from:  
550 <https://doi.org/10.1038/s41591-020-1038-6>.
- 551 41. Ohno Y, Kitamura H, Takahashi N, Ohtake J, Kaneumi S, Sumida K, et al. IL-  
552 6 down-regulates HLA class II expression and IL-12 production of human  
553 dendritic cells to impair activation of antigen-specific CD4<sup>+</sup> T cells. Cancer  
554 Immunol Immunother. 2016.

- 555 42. Yap JKY, Moriyama M, Iwasaki A. Inflammasomes and Pyroptosis as  
556 Therapeutic Targets for COVID-19. *J Immunol.* 2020.
- 557 43. Yuan J, Zou R, Zeng L, Kou S, Lan J, Li X, et al. The correlation between  
558 viral clearance and biochemical outcomes of 94 COVID-19 infected  
559 discharged patients. *Inflamm Res.* 2020.
- 560 44. Yan L, Zhang HT, Goncalves J, Xiao Y, Wang M, Guo Y, et al. An  
561 interpretable mortality prediction model for COVID-19 patients. *Nat Mach*  
562 *Intell.* 2020.
- 563 45. Cauchois R, Koubi M, Delarbre D, Manet C, Carvelli J, Blasco VB, et al. Early  
564 IL-1 receptor blockade in severe inflammatory respiratory failure  
565 complicating COVID-19. *Proc Natl Acad Sci.* 2020.
- 566 46. Qin C, Zhou L, Hu Z, Zhang S, Yang S, Tao Y, et al. Dysregulation of immune  
567 response in patients with COVID-19 in Wuhan, China. *Clin Infect Dis.* 2020.
- 568 47. McGonagle D, Sharif K, O'Regan A, Bridgewood C. The Role of Cytokines  
569 including Interleukin-6 in COVID-19 induced Pneumonia and Macrophage  
570 Activation Syndrome-Like Disease. *Autoimmunity Reviews.* 2020.
- 571 48. Merad M, Martin JC. Pathological inflammation in patients with COVID-19:  
572 a key role for monocytes and macrophages. *Nature Reviews Immunology.*  
573 2020.
- 574 49. Park MD. Macrophages: a Trojan horse in COVID-19? *Nat Rev Immunol.*  
575 2020.
- 576 50. Fintelman-Rodrigues N, Sacramento CQ, Lima CR, Silva FS da, Ferreira A,  
577 Mattos M, et al. Atazanavir inhibits SARS-CoV-2 replication and pro-  
578 inflammatory cytokine production. *bioRxiv.* 2020.
- 579 51. Hantoushzadeh S, Norooznezhad AH. Possible Cause of Inflammatory Storm  
580 and Septic Shock in Patients Diagnosed with (COVID-19). *Arch Med Res.*  
581 2020.
- 582 52. Hantoushzadeh S, Norooznezhad AH. Inappropriate Antibiotic Consumption  
583 as a Possible Cause of Inflammatory Storm and Septic Shock in Patients  
584 Diagnosed with Coronavirus Disease 2019 (COVID-19). *Arch Med Res.*  
585 2020.
- 586  
587  
588  
589

590 **FIGURE LEGENDS**

591

592 **Figure 1. SARS-Cov-2 induces monocyte cell death through pyroptosis.** Human  
593 monocytes were infected with SARS-CoV-2 (MOI 0.1) for 24 h. As a positive control,  
594 monocytes were stimulated with LPS (500ng/mL) for 23 h and after this time, incubated  
595 with ATP (2 mM) for 1 h. **(A)** Cell viability was assessed through the measurement of  
596 LDH release in the supernatant of monocytes. **(B, C and D)** Monocytes' monolayers were  
597 stained with propidium iodide (PI) plus Annexin V and pyroptotic cell death were  
598 determine by flow cytometer analysis and **(E)** labeled with DAPI to visualize the nuclei  
599 fluorescence microscopy. Images and Graph data are representative of six independent  
600 experiments. Data are presented as the mean  $\pm$  SEM \*  $P < 0.05$  versus control group  
601 (MOCK).

602 **Figure 2. SARS-CoV-2 induce inflammasome activation in human monocytes.**  
603 Human monocytes were pretreated with caspase-1 inhibitor (AC-YVAD-CMK – 1  $\mu$ M),  
604 pan-caspase inhibitor (ZVAD-FMK - 10  $\mu$ M) or necroptosis inhibitor (Nec-1 - 25  $\mu$ M)  
605 for 1 h and infected with SARS-Cov-2 (MOI 0.1) for 24 h. Monocytes were stimulated  
606 with LPS (500ng/mL) for 23 h and after this time were stimulated with ATP (2 mM) for  
607 1 h as a positive control group for the formation of inflammasomes and pyroptosis  
608 induction. **(A, B)** Monocytes' monolayers were used for determination of the levels of  
609 pro-caspase-1 and cleaved caspase-1 by western blot analysis. **(C - F)** Monocytes were  
610 stained with FAM-YVAD-FLICA and FAM-FLICA to determine the caspase-1 and  
611 caspase-3/7 activity, respectively, by flow cytometry. **(G)** Cell culture supernatants were  
612 collected for the measurement of the levels of IL-1 $\beta$ . Western blot, histogram and graph  
613 data are representative of six independent experiments. Data are presented as the mean  $\pm$   
614 SEM #  $P < 0.05$  versus infected and untreated group.

615 **Figure 3. Inflammasome activation amplify pro-inflammatory cytokines secretion**  
616 **in infected monocytes.** Human monocytes were pretreated with caspase-1 inhibitor (AC-  
617 YVAD-CMK – 1  $\mu$ M), pan-caspase inhibitor (ZVAD-FMK - 10  $\mu$ M), necroptosis  
618 inhibitor (Nec-1 - 25  $\mu$ M) or with inhibitor of IL-1 $\beta$  receptor (IL-1RA – 1  $\mu$ M).  
619 Monocytes were stimulated with LPS (500ng/mL) for 23 h and after this time were  
620 stimulated with ATP (2 mM) for 1 h as a positive control group for the formation of  
621 inflammasomes and pyroptosis induction. Cell culture supernatants were collected for the  
622 measurement of the levels of **(A)** IL-6, **(B)** TNF- $\alpha$  and **(C)** IL-8. Graphs data are

623 representative of six independent experiments. Data are presented as the mean  $\pm$  SEM #  
624  $P < 0.05$  versus infected and untreated group.

625 **Figure 4. Infection with SARS-CoV-2 decreases the expression of HLA in human**  
626 **monocytes independently of the activation of inflammasomes.** Human monocytes  
627 were pretreated with caspase-1 inhibitor (AC-YVAD-CMK – 1  $\mu$ M) for 1 h and infected  
628 with SARS-Cov-2 for 24 h. **(A, B)** Monocytes were stained with HLA-DR APC.H7 or  
629 Isotype control APC.H7 to determine the HLA-DR expression by flow cytometry. Mean  
630 fluorescence intensity (MFI) value for each sample was represented in graphics.  
631 Histogram and graphs datas are representative of six independent experiments. Data are  
632 presented as the mean  $\pm$  SEM \*  $P < 0.05$  versus uninfected group (MOCK).

633 **Figure 5. Atazanavir prevented inflammasome-dependent pyroptosis.** Human  
634 monocytes were infected with SARS-Cov-2 and treated with atazanavir – ATV (10  $\mu$ M),  
635 ribavirina (10  $\mu$ M) or Lopinavir (10  $\mu$ M) for 24 h. **(A, B and C)** Monocytes were stained  
636 with FAM-YVAD-FLICA or FAM-FLICA and HLA-DR APC.H7 or IgG APC.H7 to  
637 determine the caspase-1 and caspase-3/7 activity and HLA-DR expression, respectively  
638 and analyzed by flow cytometry. **(D – G)** Culture supernatants were collected and the  
639 levels of IL-1 $\beta$ , IL-6, TNF- $\alpha$  and IL-8 were determined by ELISA. **(H)** Assessment of  
640 cell viability through the measurement of LDH release in the supernatant of monocytes.  
641 **(I and J)** Monocytes were stained with HLA-DR APC.H7 to determine the HLA-DR  
642 expression by flow cytometry. Histogram and graphs datas are representative of six  
643 independent experiments. Data are presented as the mean  $\pm$  SEM \*  $P < 0.05$  versus control  
644 group (MOCK); #  $P < 0.05$  versus only infected group.

645 **Figure 6. Inflammasome activation and pyroptosis are risk factors in critically ill**  
646 **COVID-19 patients.** Monocytes isolated from blood samples of critically ill patients  
647 with COVID-19 and healthy donors. **(A and B)** monocytes were stained with FAM-  
648 YVAD-FLICA or **(C and D)** propidium iodide (PI) and analyzed by flow cytometry. **(E)**  
649 plasma was separated and the levels of IL-1 $\beta$  were determined by ELISA. Western blot,  
650 histogram and graphs datas are representative of 9 critically ill patients and 8 healthy  
651 donors. Data are presented as the mean  $\pm$  SEM \*  $P < 0.05$  versus healthy donors (HD).

652 **Figure 7.** Representative scheme of the SARS-CoV-2 infection in activation of  
653 inflammasome and pyroptosis in monocyte with downregulation of HLA-DR expression  
654 and effects of ATV treatment in this phenomenon.

655

656

657

658

659

660

661

662

663

664

665

666

667

668

669

670

671

672

673

674 **Table 1:** Characteristics of COVID-19 patients and control subjects.

675

676

677

678

679

680

681

682

683

684

685

686

687

688

689

690

691

692

693

694

695

696

697

698

699

700

701

702

| Characteristics <sup>1</sup>                  | Control (N=8)  | Covid-19 (N=9)       |
|-----------------------------------------------|----------------|----------------------|
| Age, years                                    | 52.6 (47 – 60) | 61 (33 – 79)         |
| Sex, male                                     | 8 (100 %)      | 6 (66.7 %)           |
| <b>Respiratory support</b>                    |                |                      |
| Oxygen supplementation                        | 0 (0 %)        | 3 (33.3 %)           |
| Mechanical ventilation                        | 0 (0 %)        | 6 (66.7 %)           |
| <b>SAPS 3</b>                                 |                | 59.25 (31 – 75)      |
| PaO <sub>2</sub> /FiO <sub>2</sub> ratio      | -              | 210.75 (87 – 509.5)  |
| Vasopressor                                   | -              | 3 (33.3 %)           |
| Time from symptom onset to blood sample, days | -              | 10 (6 – 18)          |
| <b>Status on Jun 30th</b>                     |                |                      |
| Dead                                          | -              | 5 (55.55 %)          |
| Discharged                                    | -              | 1 (11.1 %)           |
| Hospitalized                                  | -              | 3 (33.3 %)           |
| <b>Comorbidities</b>                          |                |                      |
| Obesity                                       | 1 (11.1 %)     | 1 (11.1 %)           |
| Hypertension                                  | 3 (33.3%)      | 3 (33.3 %)           |
| Diabetes                                      | 0 (0%)         | 0 (0 %)              |
| Cancer                                        | 0 (0%)         | 0 (0 %)              |
| Chronic heart disease <sup>2</sup>            | 0 (0%)         | 0 (0 %)              |
| <b>Presenting symptoms</b>                    |                |                      |
| Cough                                         | 0 (0 %)        | 3 (33,3 %)           |
| Fever                                         | 0 (0 %)        | 3 (33,3 %)           |
| Dyspnea                                       | 0 (0 %)        | 4 (44,4 %)           |
| Headache                                      | 0 (0 %)        | 0 (0 %)              |
| Anosmia                                       | 0 (0 %)        | 0 (0 %)              |
| <b>Laboratory findings on admission</b>       |                |                      |
| Lymphocyte count, cells/mm <sup>3</sup>       | -              | 1,355.8 (552 –2,564) |
| Platelet count, x 1000/mm <sup>3</sup>        | -              | 169.6 (92 – 278)     |
| Leukocytes                                    | -              | 8,036 (8.03-18,670)  |
| C Reactive Protein, mg/L                      | -              | 14.78 (0.1 – 30.8)   |

703  
704  
705  
706  
707  
708  
709  
710  
711  
712  
713  
714  
715  
716  
717  
718  
719  
720  
721  
722  
723  
724  
725  
726  
727  
728  
729  
730  
731  
732  
733  
734  
735  
736

**FIGURE 1**

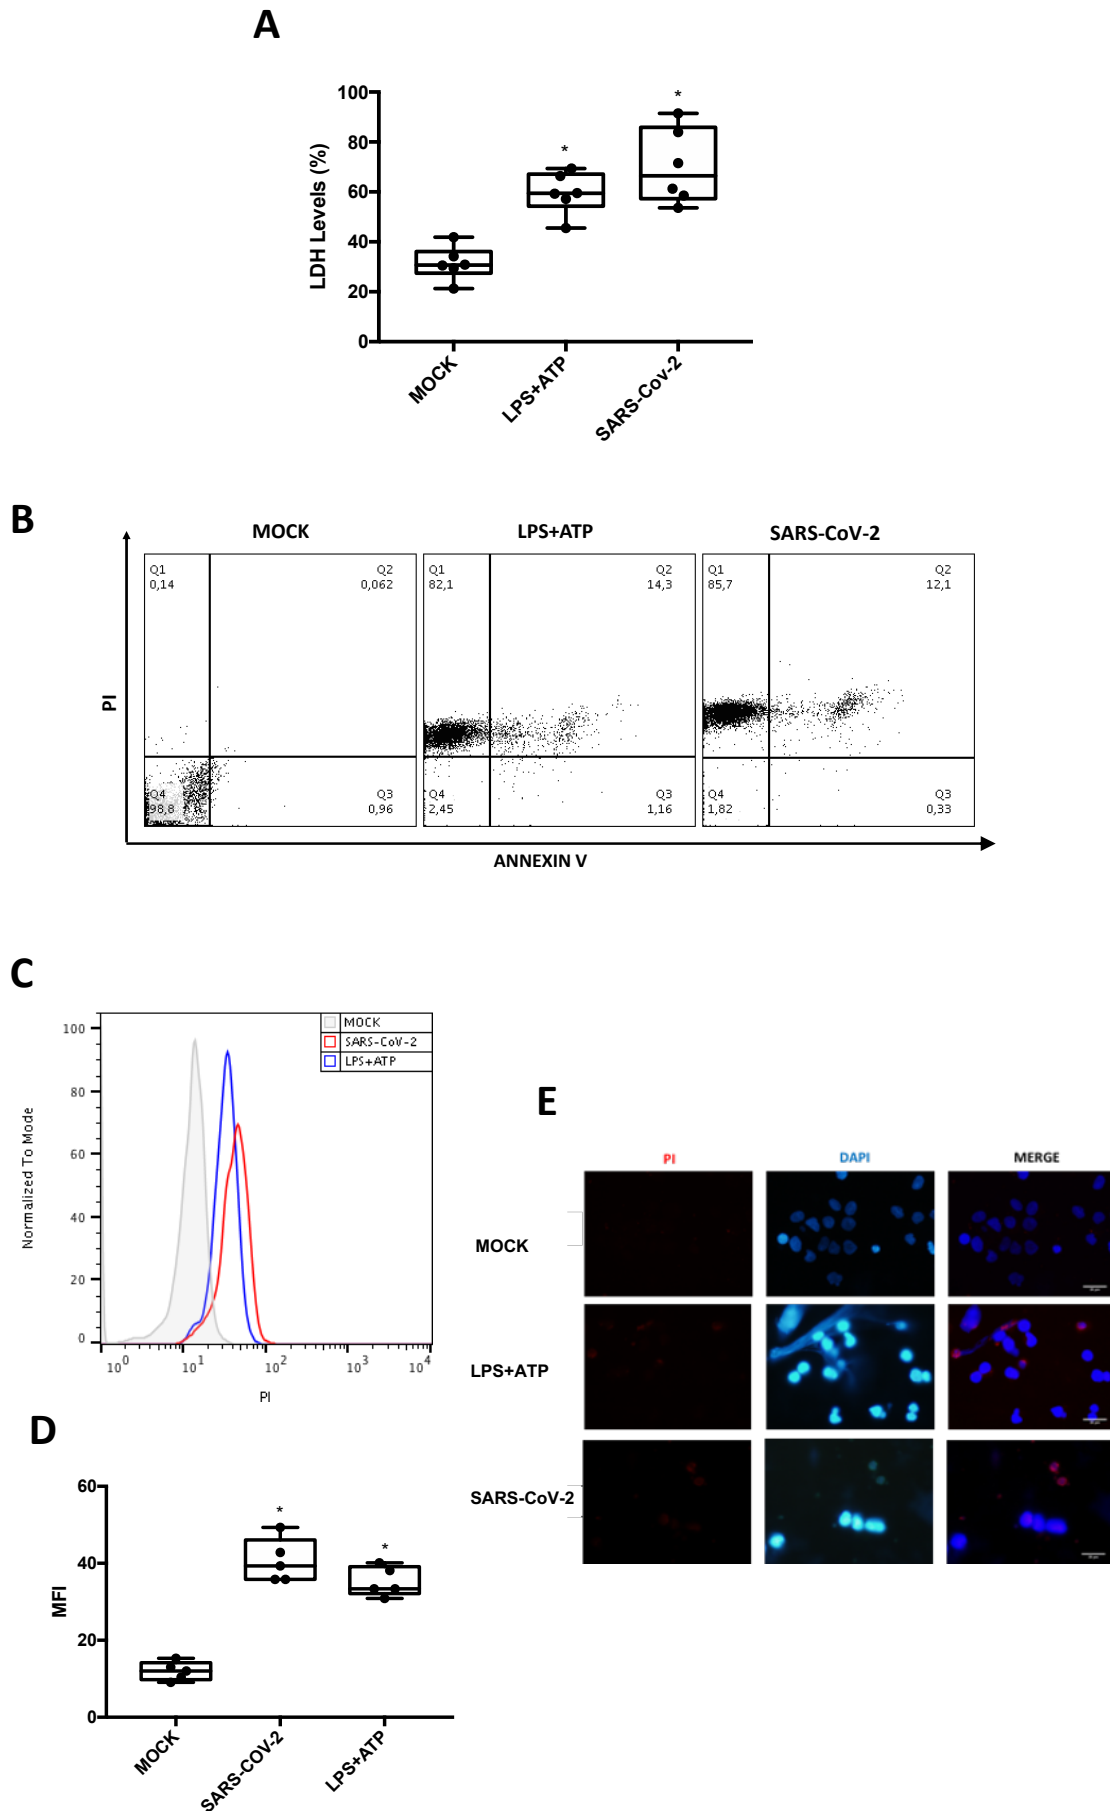



737

**FIGURE 2**

738

739

740

741

742

743

744

745

746

747

748

749

750

751

752

753

754

755

756

757

758

759

760

761

762

763

764

765

766

767

768

769

770

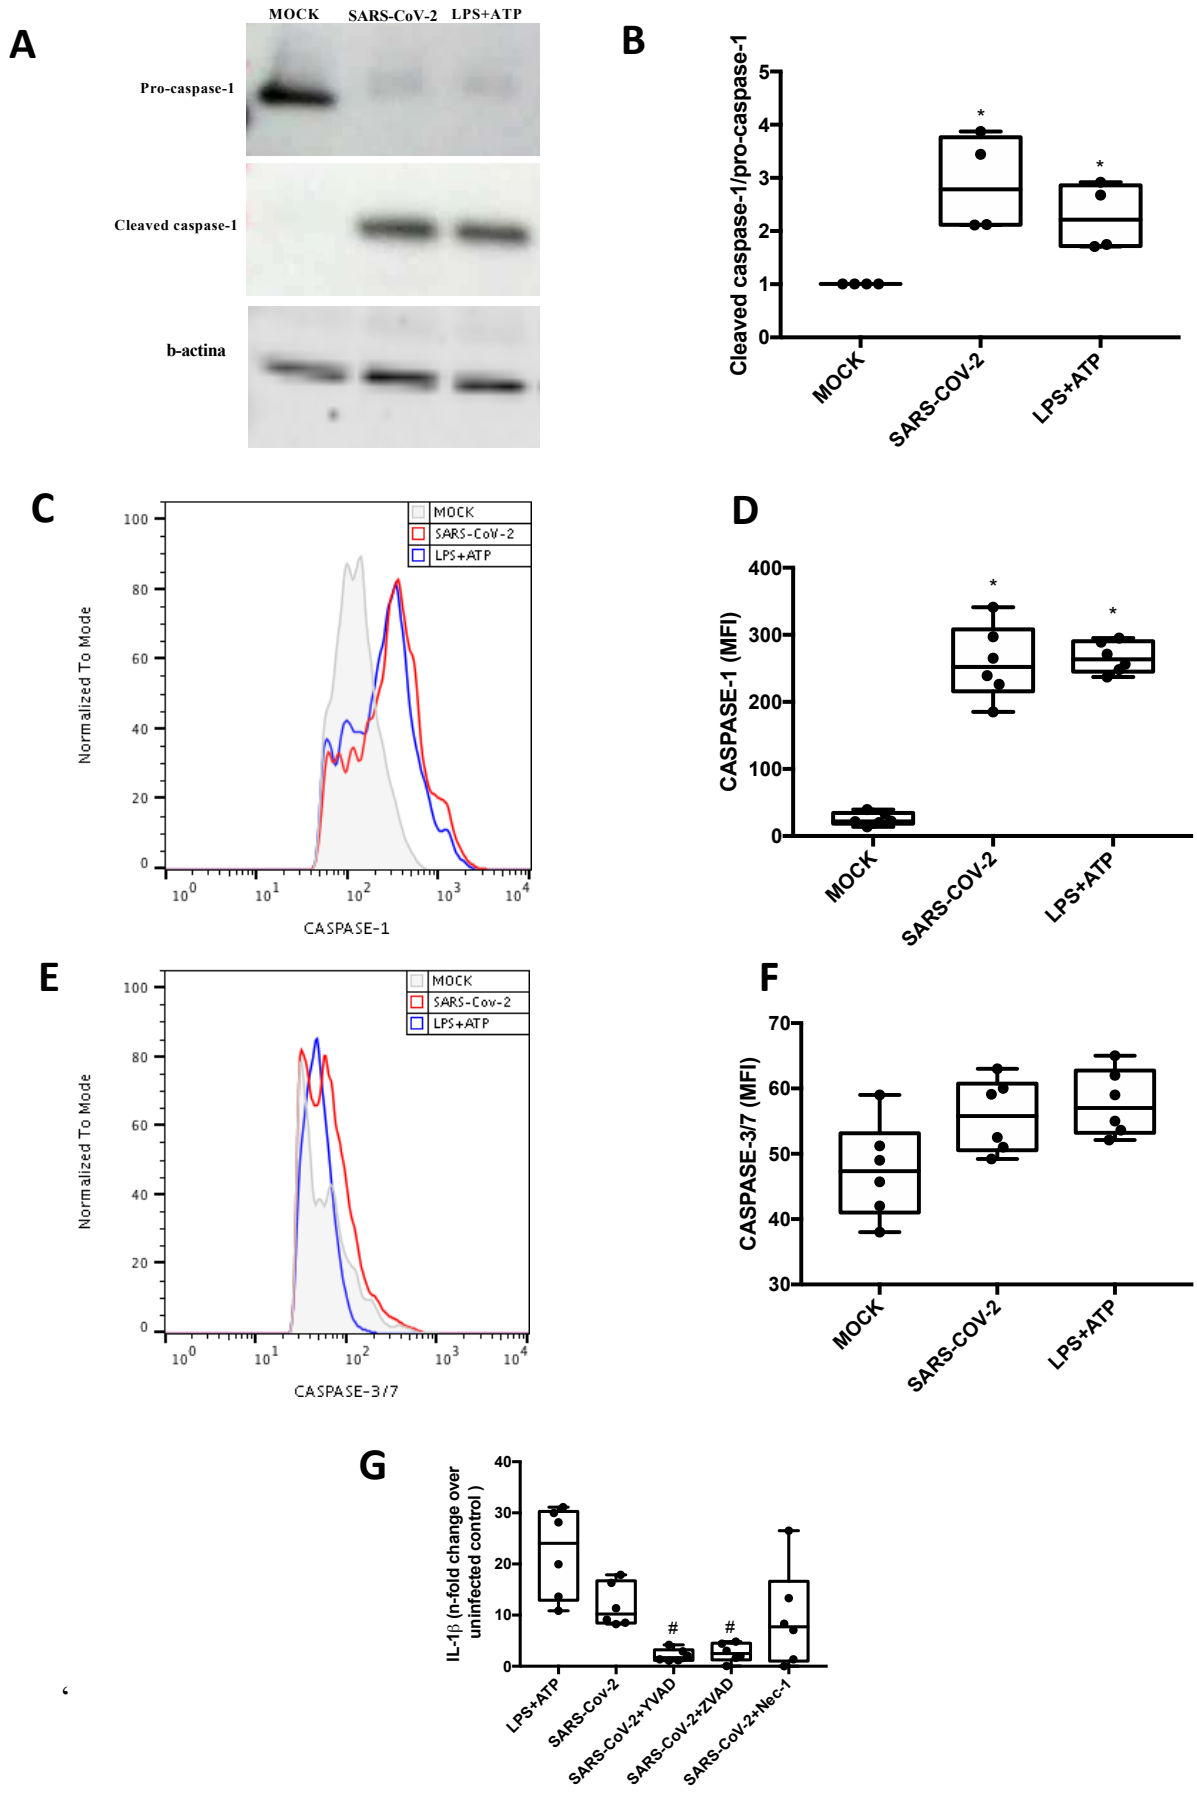

771  
772  
773  
774  
775  
776  
777  
778  
779  
780  
781  
782  
783  
784  
785  
786  
787  
788  
789  
790  
791  
792  
793  
794  
795  
796  
797  
798  
799  
800  
801  
802  
803  
804

**FIGURE 3**

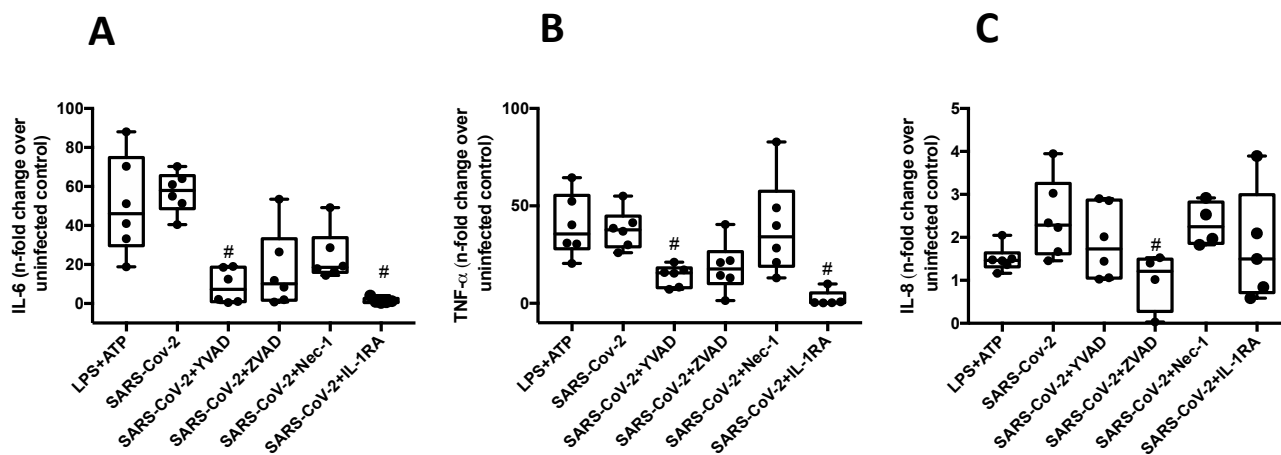

805  
806  
807  
808  
809  
810  
811  
812  
813  
814  
815  
816  
817  
818  
819  
820  
821  
822  
823  
824  
825  
826  
827  
828  
829  
830  
831  
832  
833  
834  
835  
836  
837  
838

**FIGURE 4**

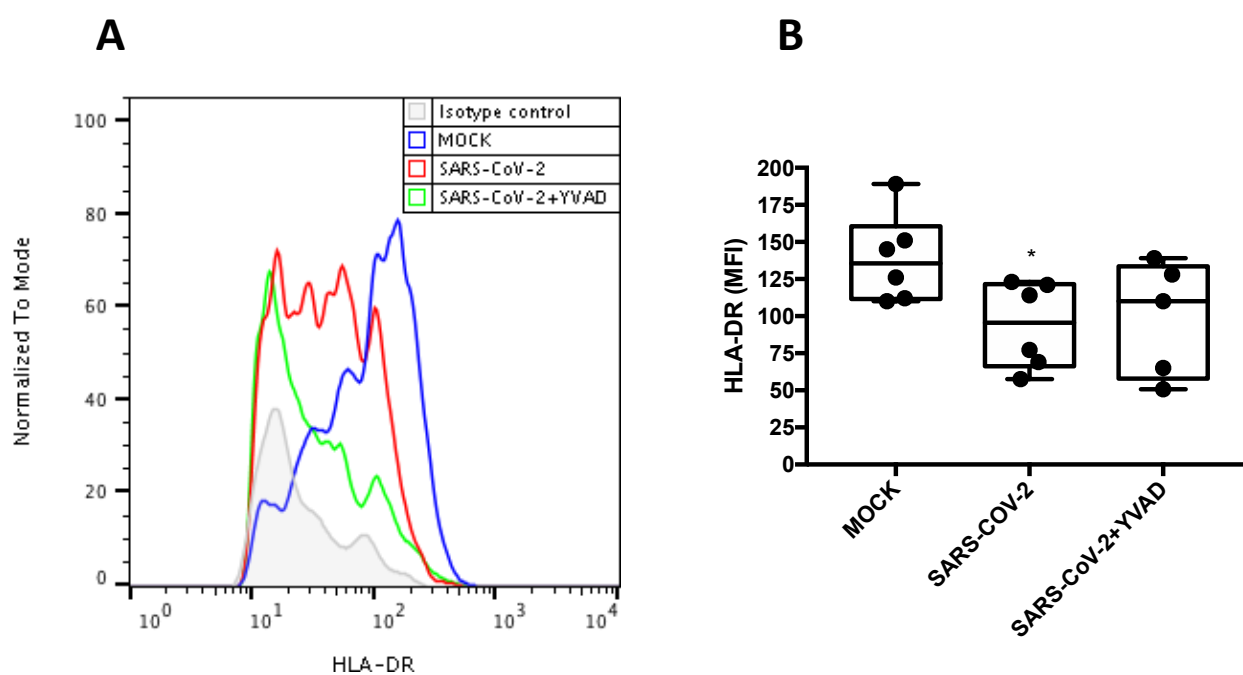

839  
840  
841  
842  
843  
844  
845  
846  
847  
848  
849  
850  
851  
852  
853  
854  
855  
856  
857  
858  
859  
860  
861  
862  
863  
864  
865  
866  
867  
868  
869  
870  
871  
872

**FIGURE 5**

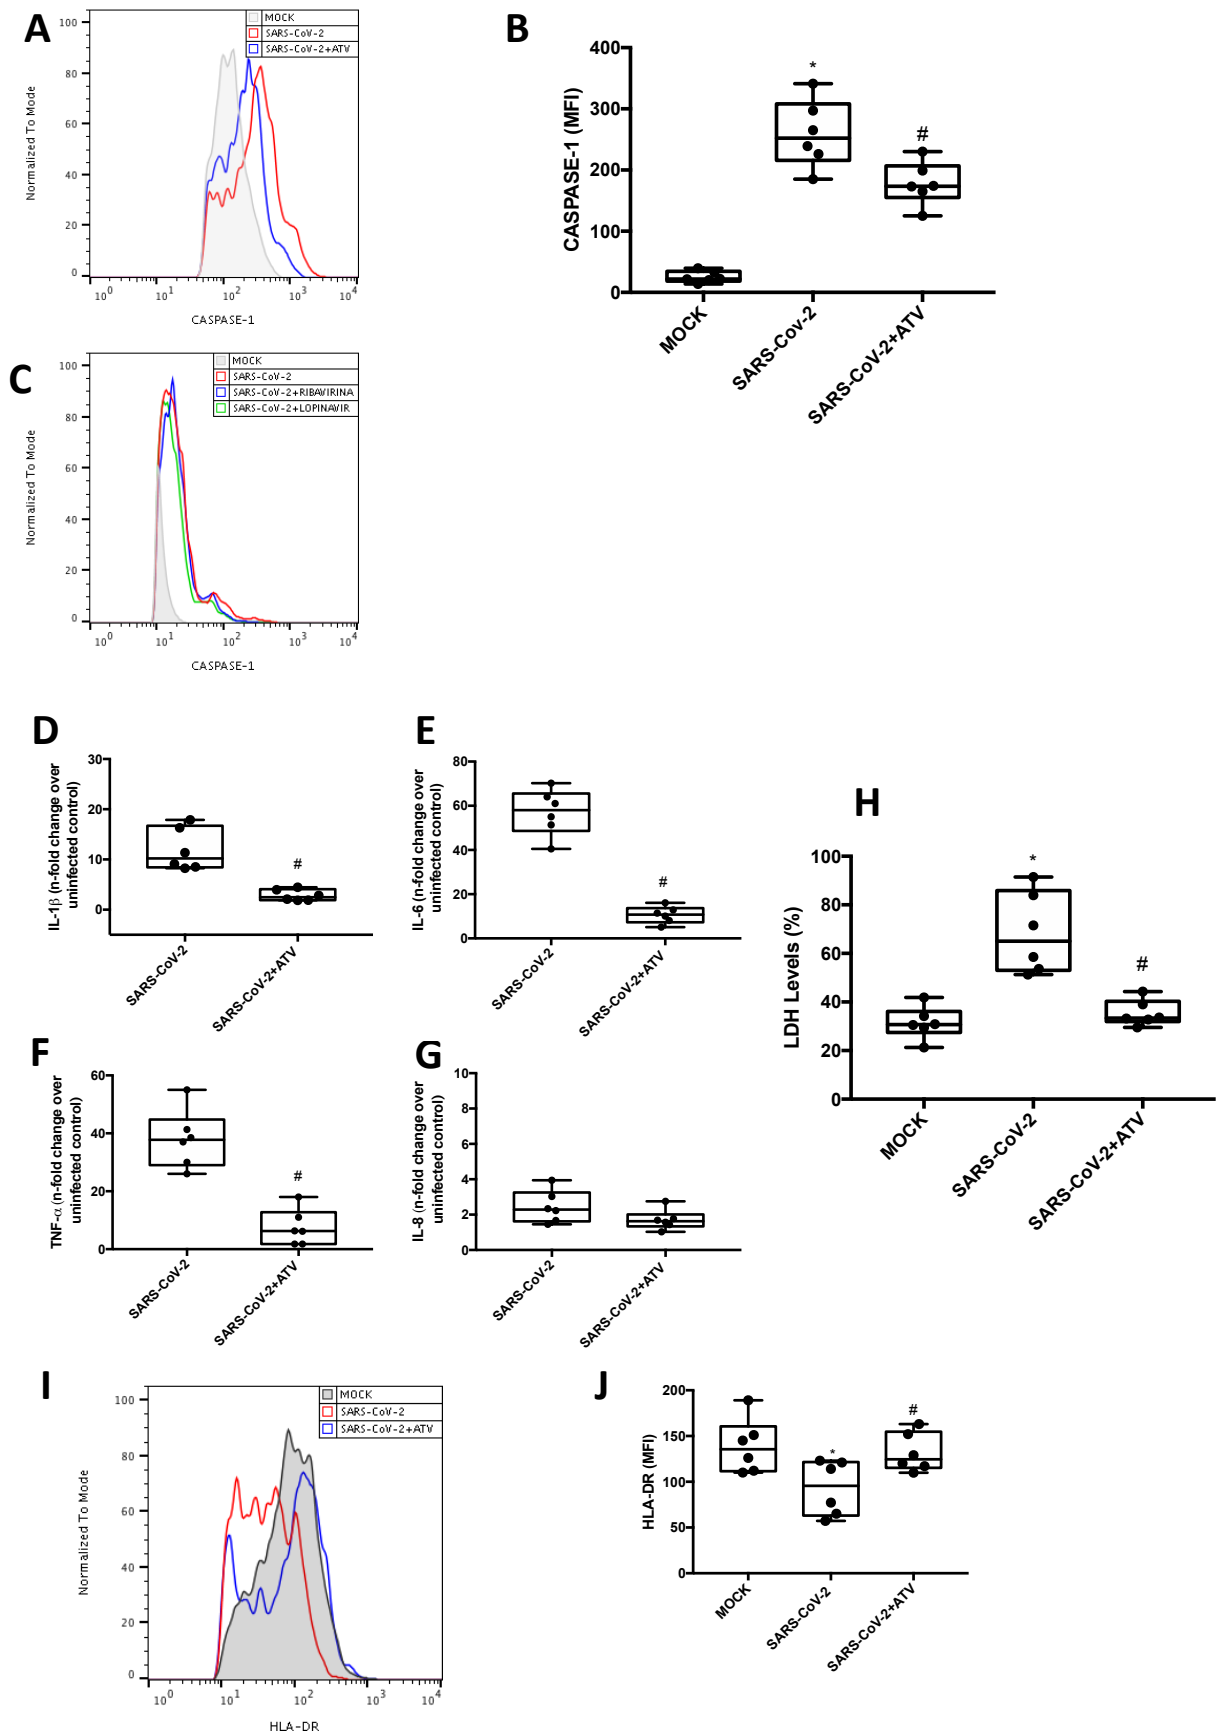

873

**FIGURE 6**

874

875

876

877

878

879

880

881

882

883

884

885

886

887

888

889

890

891

892

893

894

895

896

897

898

899

900

901

902

903

904

905

906

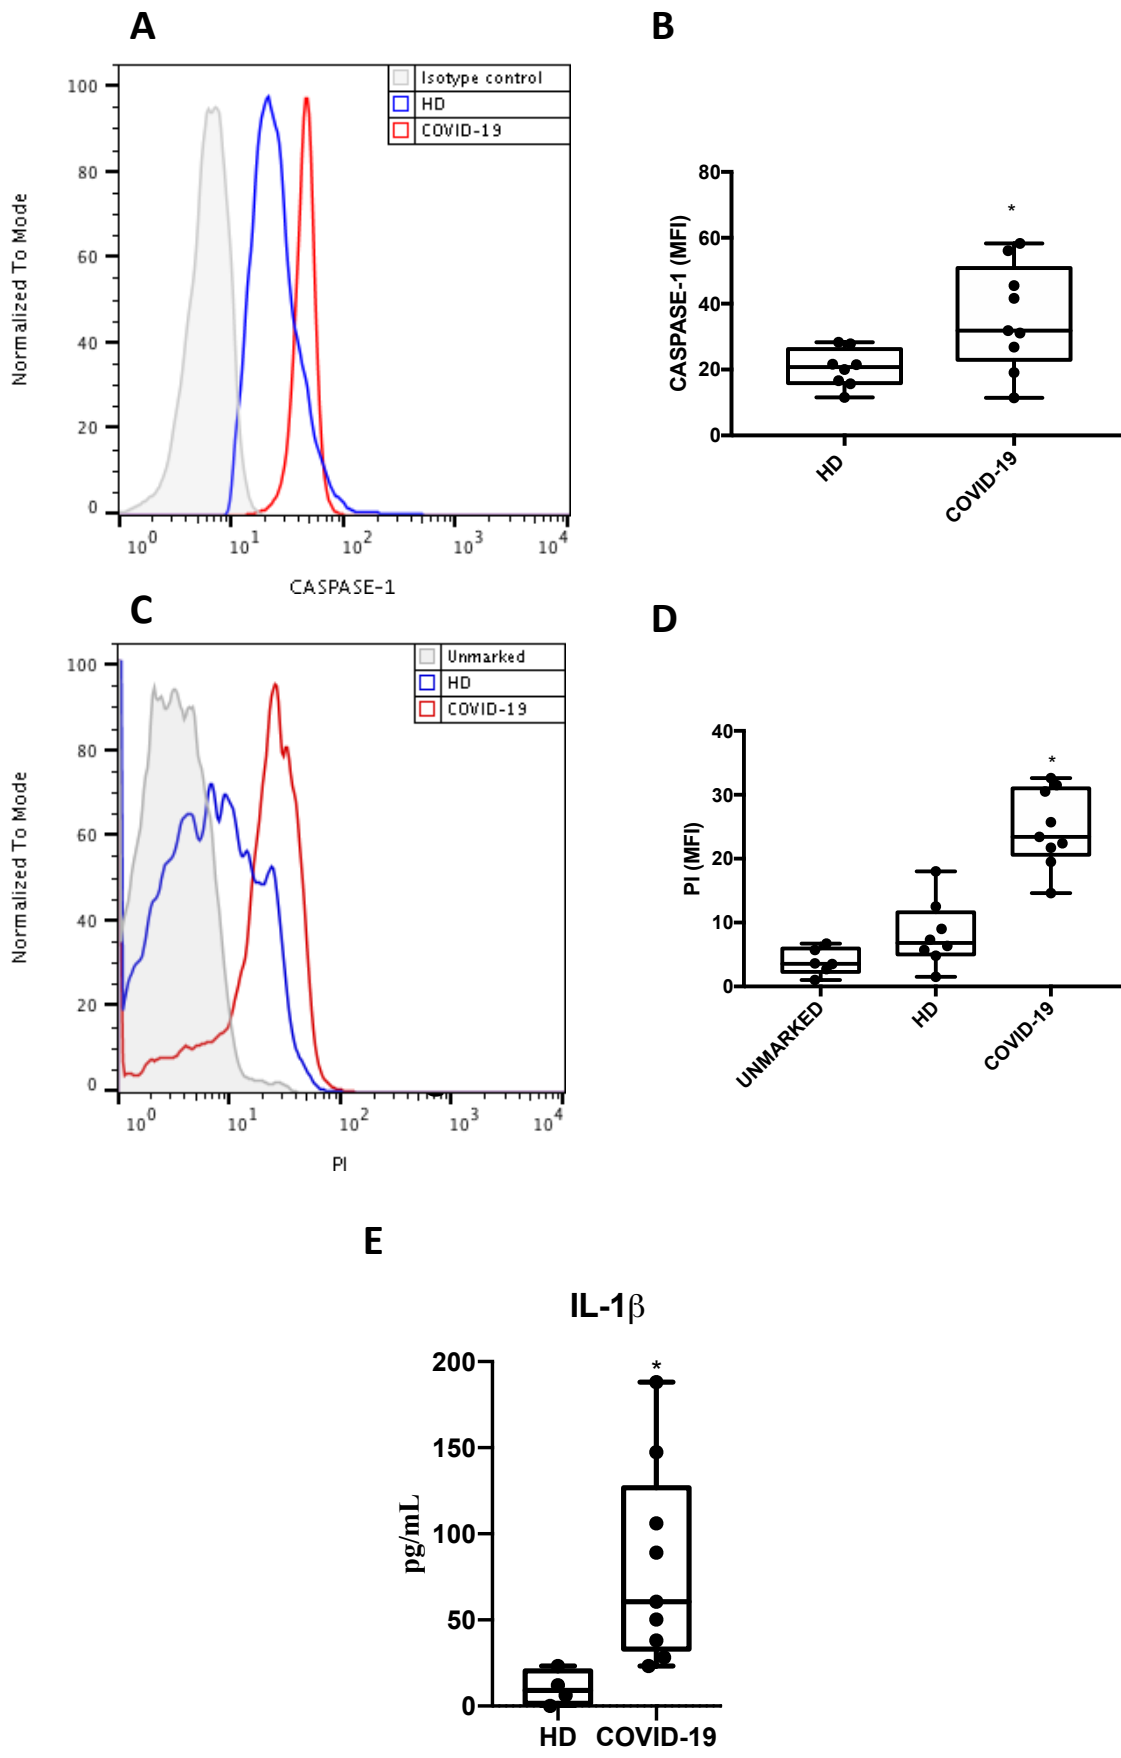

907  
908  
909  
910  
911  
912  
913  
914  
915  
916  
917  
918  
919  
920  
921  
922  
923  
924  
925  
926  
927  
928  
929  
930  
931  
932  
933  
934  
935  
936  
937  
938  
939  
940  
941  
942  
943  
944  
945  
946  
947  
948  
949  
950  
951  
952  
953  
954

**FIGURE 7**

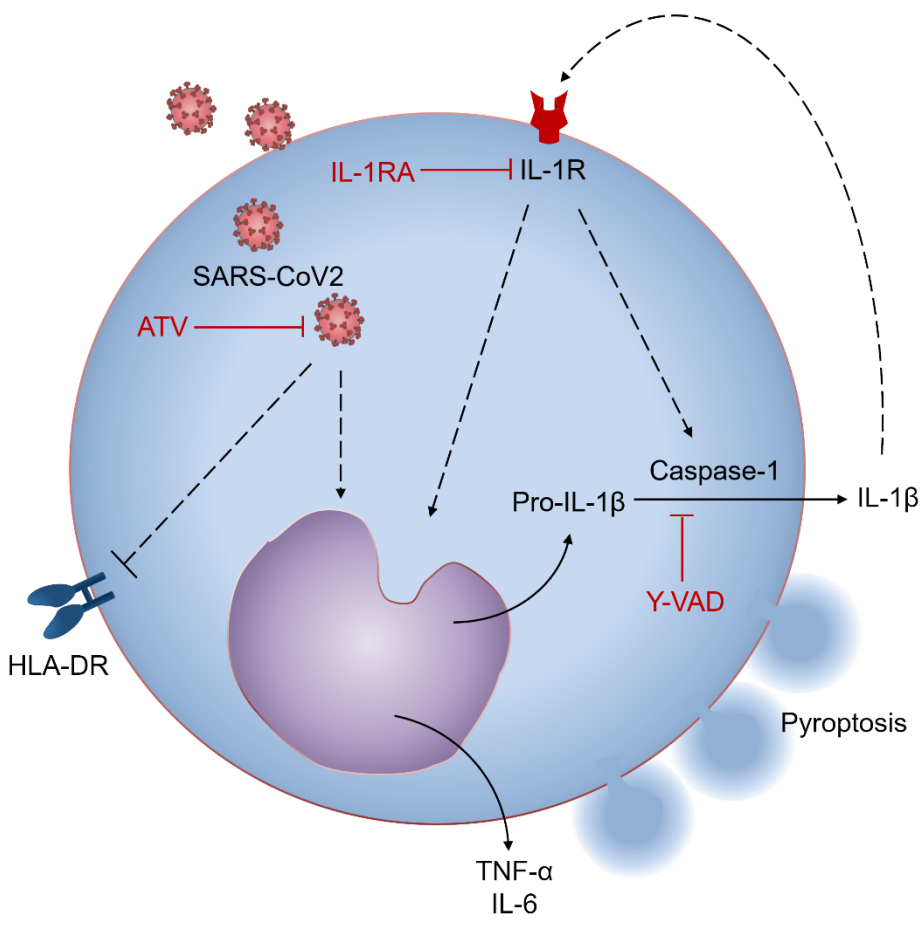

955 **FIGURE S1**

956

957

958

959

960

961

962

963

964

965

966

967

968

969

970

971

972

973

974

975

976

977

978

979

980

981

982

983

984

985

986

987

988

989

990

991

992

993

994

995

996

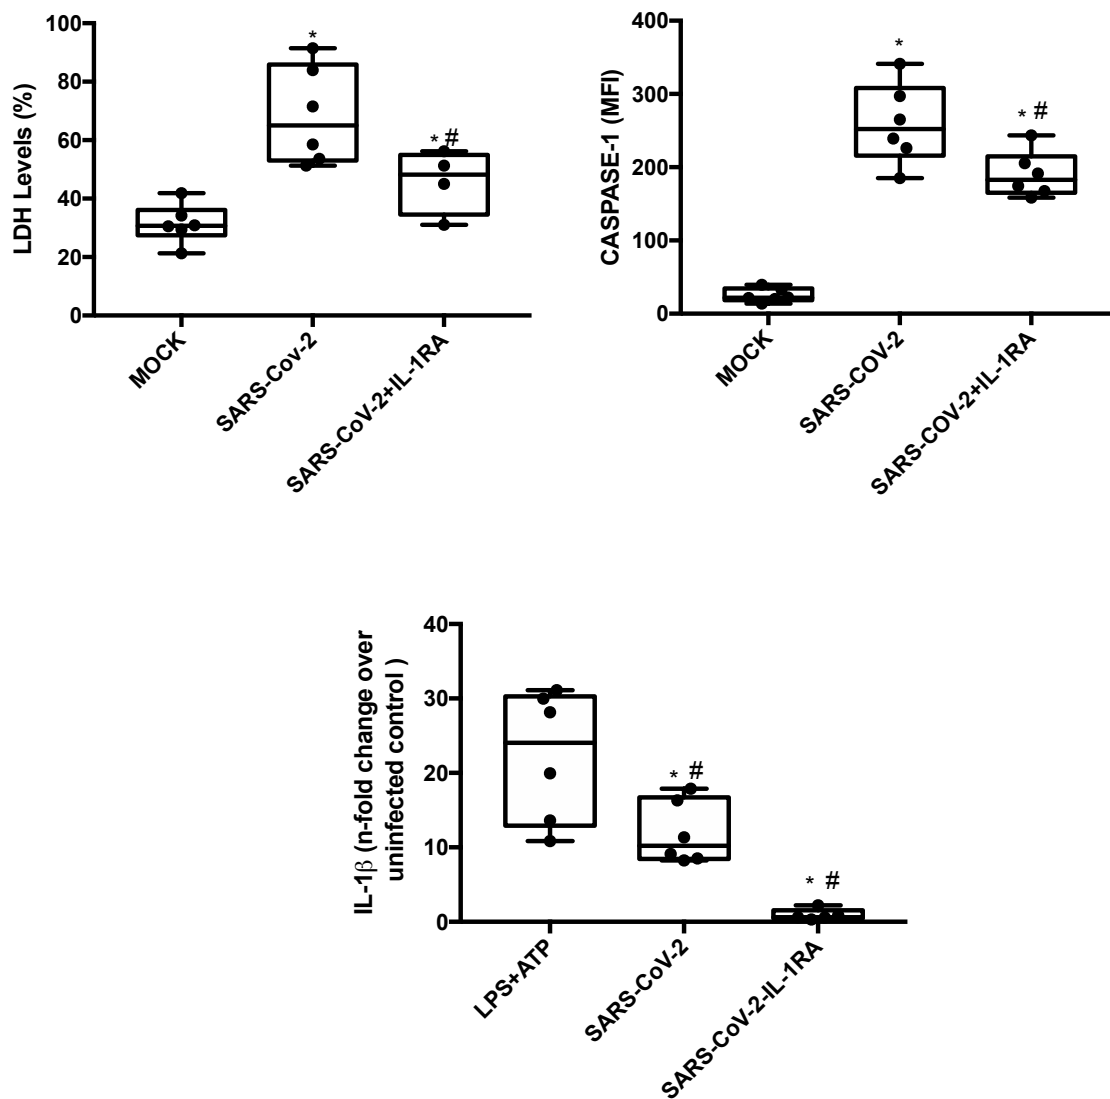

**S1 Fig. SARS-CoV-2 induce inflammasome activation and pyroptosis in human monocytes by IL-1 $\beta$  amplification.** Human monocytes were pretreated with IL-1 $\beta$  receptor (IL-1RA – 1  $\mu$ M) for 1 h and infected with SARS-Cov-2 (MOI 0.1) for 24 h. Cell viability was assessed through the measurement of LDH release in the supernatant and monocytes were stained with FAM-YVAD-FLICA to determine the caspase-1 and caspase-3/7 activity, respectively, by flow cytometry. Cell culture supernatants also were collected for the measurement of the levels of IL-1 $\beta$ . Data are presented as the mean  $\pm$  SEM #  $P < 0.05$  versus infected and untreated group; \*  $P < 0.05$  versus control group (MOCK). Graphs are representative of four independent experiments.

997 **FIGURE S2**

998  
999  
1000  
1001  
1002  
1003  
1004  
1005  
1006  
1007  
1008  
1009  
1010  
1011  
1012  
1013  
1014  
1015  
1016  
1017  
1018  
1019  
1020  
1021  
1022  
1023

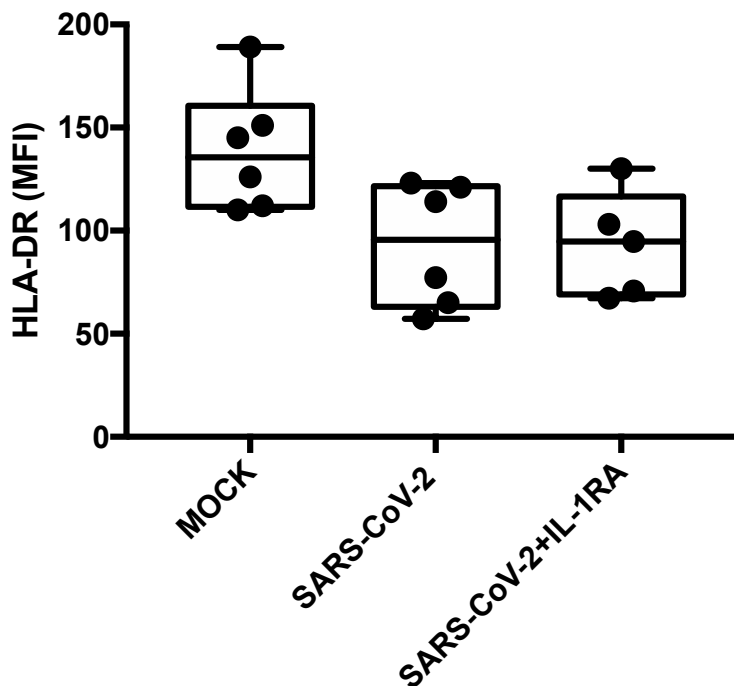

1024 **S2 Fig. Infection with SARS-CoV-2 decreases the expression of HLA in human**  
1025 **monocytes independently of the IL-1 $\beta$  activation.** Human monocytes were pretreated  
1026 with inhibitor of IL-1 $\beta$  receptor (IL-1RA – 1  $\mu$ M) for 1 h and infected with SARS-Cov-  
1027 2 for 24 h. Monocytes were stained with HLA-DR APC.H7 or IgG APC.H7 to determine  
1028 the HLA-DR expression by flow cytometry. Mean fluorescence intensity (MFI) value for  
1029 each sample was represented in graphics. Graphs datas are representative of four  
1030 independent experiments. Data are presented as the mean  $\pm$  SEM #  $P < 0.05$  versus  
1031 uninfected group (MOCK).

1032  
1033  
1034  
1035  
1036  
1037  
1038  
1039



1040 **FIGURE S3**

1041  
1042  
1043  
1044  
1045  
1046  
1047  
1048  
1049  
1050  
1051  
1052  
1053  
1054  
1055  
1056

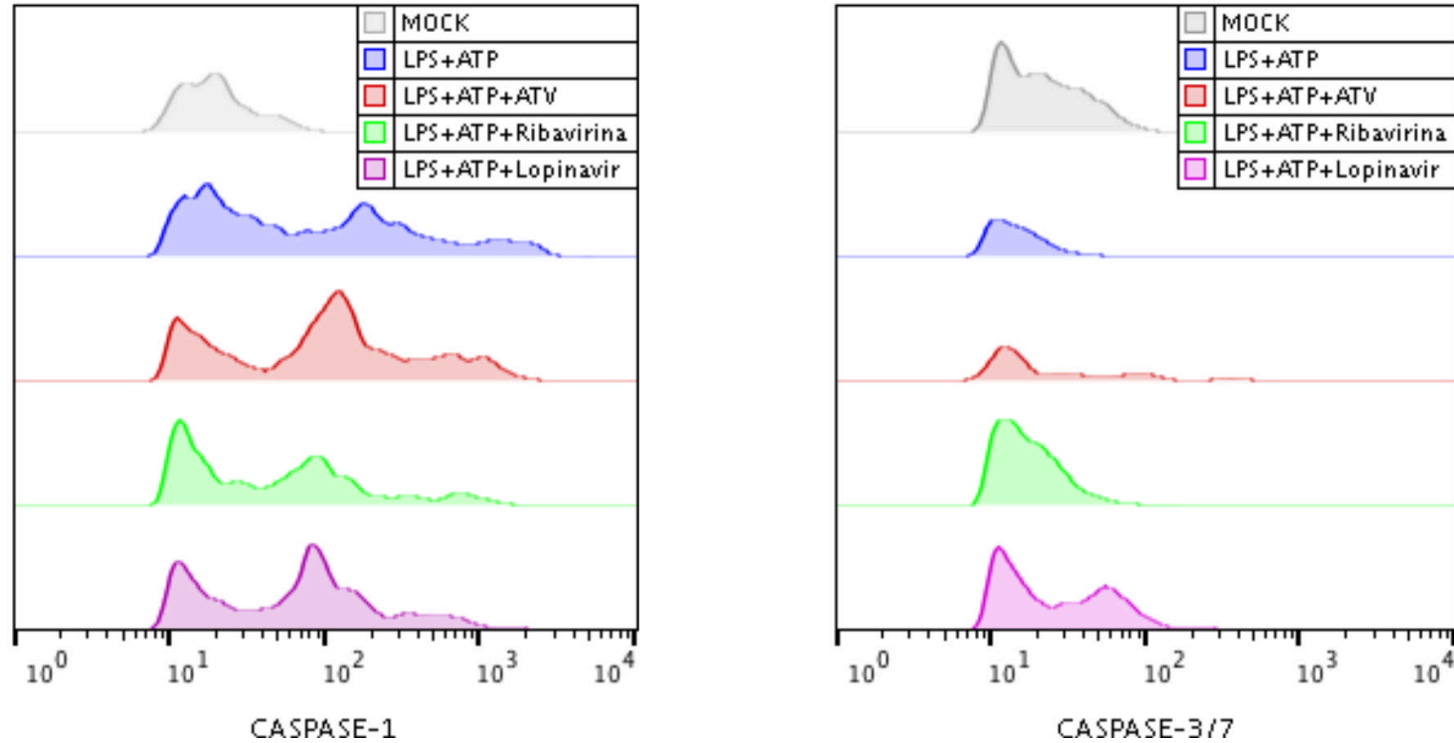

1057 **S3 Fig. Evaluation of anti-inflammatory activity of ATV, LPV and ribavirin in LPS-induced monocytes.** Human monocytes were stimulated  
1058 with LPS (500ng/mL) for 23 h and after this time were stimulated with ATP (2 mM) for 1 h as a positive control group for the formation of  
1059 inflammasomes and pyroptosis induction. Simultaneously, cells were treated with atazanavir – ATV (10 μM), LPV (10 μM) or ribavirin (10 μM)  
1060 for 24 h. Monocytes were stained with FAM-YVAD-FLICA (blue) or FAM-FLICA (green) to determine the caspase-1 and caspase-3/7 activity  
1061 and HLA-DR expression, respectively, and analyzed by flow cytometry. Histograms are representative of six independent experiments.

1062  
1063  
1064  
1065  
1066  
1067  
1068  
1069  
1070  
1071  
1072  
1073  
1074  
1075  
1076  
1077  
1078  
1079  
1080  
1081  
1082  
1083  
1084  
1085  
1086  
1087  
1088  
1089  
1090  
1091  
1092  
1093  
1094  
1095  
1096  
1097  
1098  
1099  
1100  
1101  
1102  
1103  
1104  
1105

**FIGURE S4**

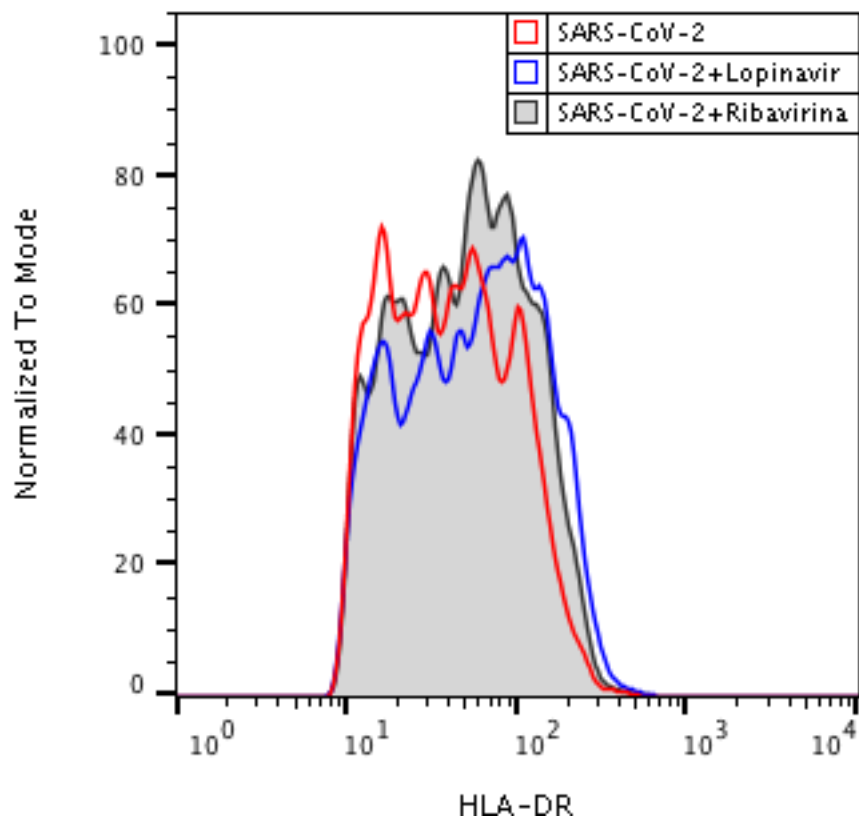

**S4 Fig. Effects of LPV and ribavirin in preventing the SARS-CoV-2-related reduced expression of HLA-DR in monocytes.** Human monocytes were infected with SARS-Cov-2 and treated with LPV (10  $\mu$ M) or ribavirina (10  $\mu$ M) for 24 h. Monocytes were stained with HLA-DR APC.H7 or IgG APC.H7 to determine the HLA-DR expression by flow cytometry. Histogram data are representative of six independent experiments.
